# 1 **Linking Cerebellar Functional Gradients to Transdiagnostic Behavioral** 2 **Dimensions of Psychopathology**

3 Debo Dong<sup>1,2</sup>, Xavier Guell<sup>3,4</sup>, Sarah Genon<sup>2,5</sup>, Yulin Wang<sup>6,7</sup>, Ji Chen<sup>2,5</sup>, Simon B. Eickhoff<sup>2,5</sup>, Cheng  
4 Luo<sup>1\*</sup>, Dezhong Yao<sup>1,8</sup>

5 <sup>1</sup>The Clinical Hospital of Chengdu Brain Science Institute, MOE Key Lab for Neuroinformation,  
6 High-Field Magnetic Resonance Brain Imaging Key Laboratory of Sichuan Province, School of life  
7 Science and technology, University of Electronic Science and Technology of China, China

8 <sup>2</sup>Institute of Neuroscience and Medicine, Brain & Behaviour (INM-7), Research Centre Jülich, Jülich,  
9 Germany

10 <sup>3</sup>McGovern Institute for Brain Research, Massachusetts Institute of Technology, Cambridge, United  
11 States

12 <sup>4</sup>Massachusetts General Hospital and Harvard Medical School, Boston, United States

13 <sup>5</sup>Institute for Systems Neuroscience, Heinrich Heine University Düsseldorf, Düsseldorf, Germany

14 <sup>6</sup>Faculty of Psychological and Educational Sciences, Department of Experimental and Applied  
15 Psychology, Vrije Universiteit Brussel, Belgium

16 <sup>7</sup>Faculty of Psychology and Educational Sciences, Department of Data Analysis, Ghent University,  
17 Belgium

18 <sup>8</sup>Research Unit of NeuroInformation, Chinese Academy of Medical Sciences, 2019RU035, Chengdu,  
19 China

20 **\*Corresponding to:** School of life science and technology, University of Electronic Science and  
21 Technology of China, Chengdu, China, Tel: +86-28-83201018, Fax: +86-(0)28-83206972; E-mail:  
22 chengluo@uestc.edu.cn (C. Luo).

23 **Running title:** Cerebellar gradients and dimensions of psychopathology

24  
25  
26  
27

1 **Abstract**

2

3 High co-morbidity and substantial overlap across psychiatric disorders encourage a transition  
4 in psychiatry research from categorical to dimensional approaches that integrate neuroscience  
5 and psychopathology. Cerebellum is involved in a wide range of nonmotor cognitive  
6 functions and mental disorders. An important question thus centers on the extent to which  
7 cerebellar function can be linked to transdiagnostic dimensions of psychopathology. Here, this  
8 question is investigated using partial least squares to identify latent dimensions linking  
9 cerebellar connectome properties as assessed by macroscale spatial gradients of connectivity  
10 to a large set of clinical and behavioral measures in 198 participants across diagnostic  
11 categories. This analysis reveals significant correlated patterns of cerebellar connectivity  
12 gradients and behavioral measures that could be represented into four latent dimensions:  
13 general psychopathology, general lack of attention regulation, internalizing symptoms, and  
14 dysfunctional memory. Each dimension is associated with a distinct spatial pattern of  
15 cerebellar connectivity gradients. These findings highlight the relevance of cerebellar  
16 connectivity as a necessity for the study and classification of transdiagnostic dimensions of  
17 psychopathology .

18

19 **Introduction**

20

21 Our understanding of cerebellar contributions to neurological function has changed from a  
22 traditional view focused on motor coordination, to a modern understanding that also  
23 implicates the cerebellum in a broad range of high-level cognitive and affective processes.<sup>1</sup>  
24 An increasing body of evidence also supports cerebellar involvement in a wide range of  
25 psychiatric disorders.<sup>2,3</sup> Up to now, most psychiatric studies investigating the role of the  
26 cerebellum have been conducted based on categorical diagnostic criteria that view psychiatric

1 disorders as independent entities.<sup>4</sup> It is increasingly recognized that existing clinical  
2 diagnostic categories might be suboptimal, as there is substantial overlap in symptoms,  
3 cognitive dysfunction and genetic factors across multiple psychiatric disorders.<sup>4,5</sup> These  
4 overlaps can be reflected by shared neurobiological structure and function, and polymorphism  
5 abnormalities across psychiatric syndromes.<sup>6-9</sup> The high rates of comorbidity between  
6 psychiatric disorders and heterogeneity within one diagnostic group further exacerbates this  
7 problem.<sup>10-12</sup> This context has motivated transdiagnostic initiatives, such as the National  
8 Institute of Mental Health's Research Domain Criteria,<sup>13</sup> which encourages a transition in  
9 psychiatry research from categorical to dimensional approaches that integrate neuroscience  
10 and psychopathology.<sup>13</sup>

11 Recent clinical neuroscience studies have begun to adopt transdiagnostic approaches to  
12 highlight the importance of altered cerebellar structure in broad risk for psychopathology.<sup>14-16</sup>  
13 Previous animal and human neuroimaging studies have provided converging evidence for the  
14 involvement of cerebellar function in a wide range of behaviors that are dependent on circuits  
15 connecting the cerebellum with multiple cerebral cortical regions.<sup>1,17-19</sup> Accumulating  
16 evidence supports dysfunctional cerebellar connectivity in many psychiatric disorders, such as  
17 schizophrenia,<sup>20</sup> bipolar disorder,<sup>21</sup> major depression,<sup>22</sup> attention-deficit/hyperactivity  
18 disorder<sup>23</sup> and autism.<sup>24</sup> Moreover, study of clinical high-risk subjects demonstrate that  
19 dysconnectivity of cerebellar circuits can serve as a state-independent neural signature for  
20 psychosis prediction and characterization.<sup>25</sup> Within this context, an understudied area of  
21 investigation is the extent to which cerebellar function can be linked to transdiagnostic  
22 dimensions of psychopathology.

23 Resting-state functional connectivity has been widely used to characterize disconnection  
24 mechanisms in many psychiatric disorders,<sup>26,27</sup> and is a promising tool for deepening our  
25 understanding of transdiagnostic dimensions.<sup>28-30</sup> However, previous studies investigating  
26 functional connectivity-informed dimensions of psychopathology often ignore the importance

1 of the cerebellum, e.g., by using a coarse delineation of the cerebellum with only a few  
2 regions of interest to represent the whole cerebellar information.<sup>29,30</sup> Recent developments in  
3 cerebellar functional mapping indicate that cerebellar functional organization can be  
4 characterized using macroscale spatial gradients of connectivity, a low dimensional  
5 continuous space that reflects the overarching spatial patterns that underpin the observed  
6 neural data.<sup>31</sup> The principal connectivity gradient of cerebellar cortex captures a progression  
7 from sensorimotor to cognitive processing areas,<sup>31</sup> similar to the organization of the cerebral  
8 cortex.<sup>32,33</sup> This low-dimensional representation of the principal axis of cerebellar macroscale  
9 functional organization thus provides a useful tool to characterize cerebellar function at the  
10 single-subject level which can then be correlated with single-subject behavioral measures.  
11 This approach offers an unprecedented opportunity to interrogate the relationship between  
12 cerebellar functional organization and behavioral measures of clinical phenomena, cognitive  
13 ability, and personality traits in mental health and disease.

14 In this study, we analyzed UCLA Consortium for Neuropsychiatric Phenomics open access  
15 dataset, a large resting-state fMRI and behavioral dataset<sup>34</sup> using gradient-based and partial  
16 least squares, a multivariate data-driven statistical techniques with the objective to discover  
17 the latent dimensions that link cerebellar functional organization to behavioral measures  
18 spanning clinical, cognitive, and personality trait domains (Table S1 and Table S2) across  
19 healthy controls (HC, n=92) and patients with attention-deficit/hyperactivity disorder (ADHD,  
20 n=35), bipolar disorder (BD, n=36) and schizophrenia (SZ, n=35). Table 1 shows a summary  
21 of demographic and clinical information of each group. This approach yielded dimensions  
22 that optimally linked co-varying cerebellar connectivity gradients and behavior in individuals  
23 across traditional diagnostic categories, in accordance with a transdiagnostic dimensional  
24 approach. Multiple control analyses were used to optimize the robustness of these latent  
25 dimensions. Furthermore, we performed 10-fold cross-validation to assess the generalization  
26 performance of latent dimensions to unseen test data. Importantly, cross-validation

1 approaches can help guard against overfitting that arises from high dimensional  
2 neurobiological data.<sup>35</sup>

3

## 4 **Results**

### 5 **Pattern of the principal functional connectivity gradient in cerebellum**

6

7 The principal gradient (or principal gradient) explains as much of the variance in the data as  
8 possible (~30%, Figure 1), represents a well-understood motor-to-supramodal organizational  
9 principle in the cerebellar connectivity. The principal connectivity gradient of cerebellar  
10 cortex captured a progression from sensorimotor to cognitive processing areas. Specifically,  
11 it extended bilaterally from lobules IV/V/VI and lobule VIII to posterior aspects of Crus I and  
12 Crus II as well as medial regions of lobule IX. This observed spatial distribution was similar  
13 to previous reports of the principal functional connectivity gradient of the cerebellar cortex in  
14 healthy humans.<sup>31</sup>

A. The principal cerebellar gradient

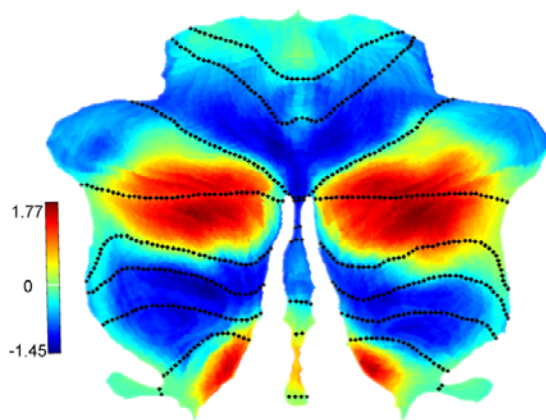

B. Variance explained by gradient

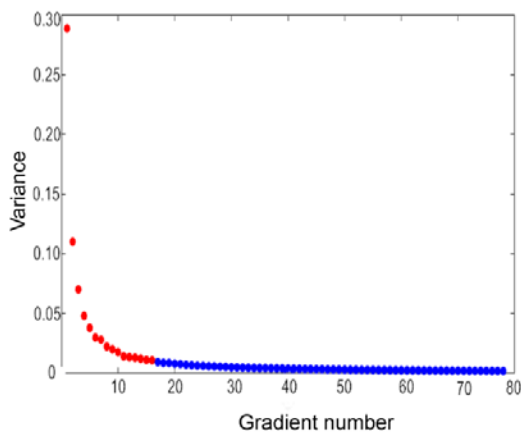

15

16 Figure 1. (A) The principal cerebellar connectivity gradient. (B) Covariance explained by  
17 each gradient. Red circles correspond to the gradients that explained at least a variance of 1%.

### 18 **Four Robust LVs Linking Cerebellar Gradients and Behavior**

1 PLS correlation analysis revealed five significant latent variables (LVs) that reflect the direct  
2 covariant mapping between cerebellar connectivity gradients and behavioral measures. Since  
3 the fifth LV did not show robustness in control analyses as detailed in Table S3, we only  
4 focused on the first four LVs (LV1:  $r=0.62$ , permuted  $p=2.0 \times 10^{-2}$ ; LV2:  $r=0.56$ , permuted  
5  $p=2.0 \times 10^{-3}$ ; LV3:  $r=0.61$ , permuted  $p=3.0 \times 10^{-2}$ ; LV4:  $r=0.60$ , permuted  $p=1.2 \times 10^{-2}$ ; **Figures 2,**  
6 **3, 4, 5A**). The variance explained by each LV was 19.5%, 13.7%, 8.8% and 6.0%,  
7 respectively (Figure S1). Importantly, 10-fold cross-validation confirmed generalizability (i.e.  
8 robustness of results in new data) of the first four LVs, as indicated by significant correlation  
9 between cerebellar gradient and behavioral composite scores in the test folds (LV1,  $r=0.21$ ,  
10  $p=2.5 \times 10^{-3}$ ; LV2,  $r=0.27$ ,  $p=2.1 \times 10^{-3}$ ; LV3,  $r=0.22$ ,  $p=2.3 \times 10^{-3}$ ; LV4,  $r=0.16$ ,  $p=2.5 \times 10^{-3}$ ).  
11 Furthermore, the four LVs were robust to GSR and total cerebellar grey matter volume  
12 regression, as indicated by the high correlation ( $r>0.83$ ) between saliences of original PLS  
13 and PLS with GSR or total cerebellar grey matter volume regression. In addition, each  
14 diagnostic group contributed similarly to the overall composite correlations of these four LVs  
15 (FDR  $q > 0.05$  for all pairwise comparisons, see Table S4). We also found that age, sex,  
16 education, site, or FD were not associated with any LV (Table S5).

### 17 **LV1: general psychopathology**

18 The main contributors of behavior to LV1 were overall associated with greater  
19 psychopathology, e.g., higher impulsiveness, mood lability, dysfunctional impulsivity,  
20 anxiety, depression, somatization, social/physical anhedonia (Figure 2B) and psychotic  
21 symptoms (Table S6) including mania, delusions and hallucinations; in addition to worse  
22 high-order cognitive control (e.g., working memory). LV1 included positive weight in  
23 cerebellar lobules V, VI, VIIIA and VIIIB and negative weight in Crus I and II (Figure 2C).  
24 Notably, both cerebellar gradient and behavioral composite scores were higher in all  
25 diagnostic groups when compared with HCs (Figure 2D; all differences were statistically  
26 significant except for ADHD). Exploratory analyses indicated that higher cerebellar gradient

1 and behavioral composite scores in LV1 were associated with greater medication load. There  
 2 was no significant association between LV1 composite scores and substance use (Table S5).  
 3 Our interpretation is that LV1 is associated mainly with general psychopathology and high-  
 4 order cognitive control deficits (see discussion).

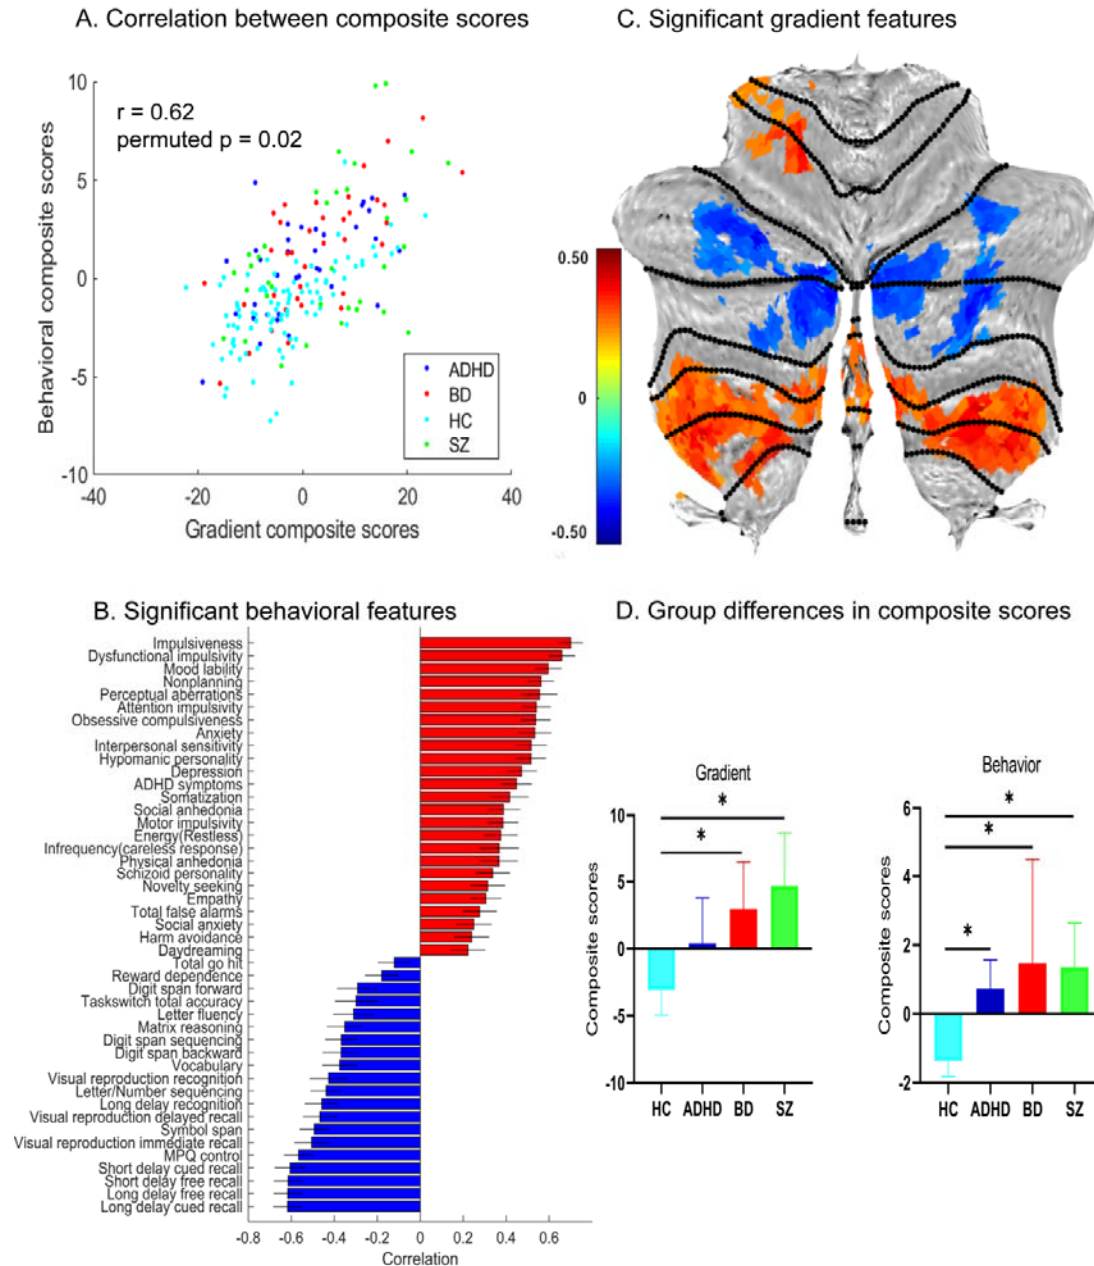

5  
 6 Figure 2. Latent variable 1: general psychopathology. (A) Correlation between cerebellar  
 7 connectivity gradient and behavioral composite scores of participants. (B) Significant

1 behavioral features associated with LV1. The contribution of each behavior is measured by  
2 correlations between participants' behavioral scores and the corresponding behavioral  
3 composite scores. Error bars indicate bootstrapped standard deviations. (C) Significant  
4 gradient pattern associated with LV1. The contribution of each voxel is measured by  
5 correlation between participants' cerebellar gradient scores and the corresponding cerebellar  
6 gradient composite scores (FDR correction,  $q < 0.05$ ). Gradient pattern displayed on cerebellar  
7 flat maps were generated using the SUIT toolbox  
8 (<http://www.diedrichsenlab.org/imaging/suit.htm>). (D) Group differences in cerebellar  
9 connectivity gradient and behavioral composite scores. Significant differences are indicated  
10 by asterisks (FDR correction,  $q < 0.05$ ).

#### 11 **LV2: general lack of attention regulation**

12 The main contributors of behavior to LV2 were mainly involved in a general lack of attention  
13 regulation, e.g., higher ADHD symptoms, attention impulsivity, depression, mood lability,  
14 interpersonal sensitivity, daydreaming and social anxiety, and lower control ability and  
15 persistence (Figure 3B). LV2 included positive weight in cerebellar Crus I, II and lobule IX  
16 and negative weight in lobules VI, VIIB and VIIIA (Figure 3C). Notably, patients with  
17 ADHD had the highest cerebellar gradient scores for LV2 (Figure 3D). Behavioral composite  
18 scores were significantly higher in patients with ADHD or BD than in HC and patients with  
19 SZ. There was no significant association between composite scores and medication load or  
20 substance use (Table S5). Our interpretation is that LV2 is associated mainly with inadequate  
21 attention regulation (see discussion).



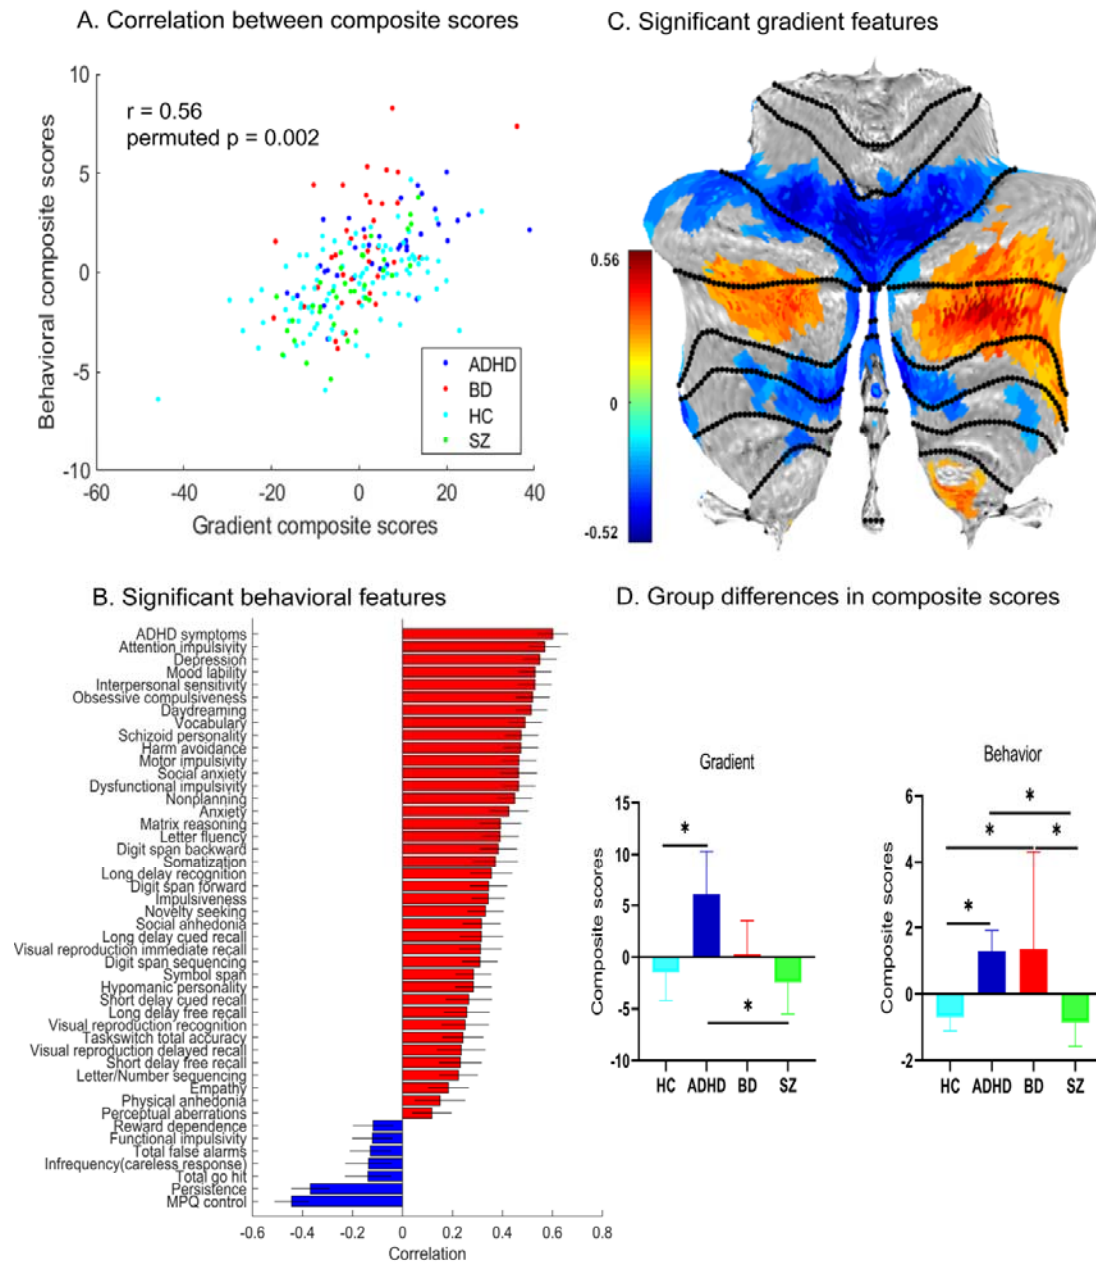

1

2 Figure 3. Latent variable 2: general lack of attention regulation. (A) Correlation between  
3 cerebellar connectivity gradient and behavioral composite scores of participants. (B)  
4 Significant behavioral features associated with LV2. The contribution of each behavior is  
5 measured by correlations between participants' behavioral scores and the corresponding  
6 behavioral composite scores. Error bars indicate bootstrapped standard deviations. (C)  
7 Significant gradient pattern associated with LV2. The contribution of each voxel is measured  
8 by correlations between participants' cerebellar gradient scores and the corresponding

1 cerebellar gradient composite scores (FDR correction,  $q < 0.05$ ). (D) Group differences in  
2 cerebellar connectivity gradient and behavioral composite scores. Significant differences are  
3 indicated by asterisks (FDR correction,  $q < 0.05$ ).

#### 4 **LV3: internalizing symptoms**

5 The main contributors of behavior to LV3 were mainly correlated with behavioral measures  
6 related to internalizing symptoms, e.g., higher harm avoidance, social anxiety, control,  
7 anhedonia, and somatization, and less externalizing symptoms, e.g., functional and motor  
8 impulsivity as well as novelty seeking (Figure 4B). LV3 included positive weight in  
9 cerebellar anterior vermis (I-VI) and negative weight in left Crus I, II, as well as lobules  
10 VIIIA and VIIIB (Figure 4C). Cerebellar gradient and behavioral composite scores were  
11 significantly higher in patients with BD or SZ when compared with patients with ADHD  
12 (Figure 4D). Higher cerebellar gradient and behavioral composite scores were associated with  
13 greater medication load (Table S5). There was no significant association between LV3  
14 composite scores and substance use (Table S5). Our interpretation is that LV3 is associated  
15 mainly with higher internalizing symptoms and lower externalizing behavior (see discussion).

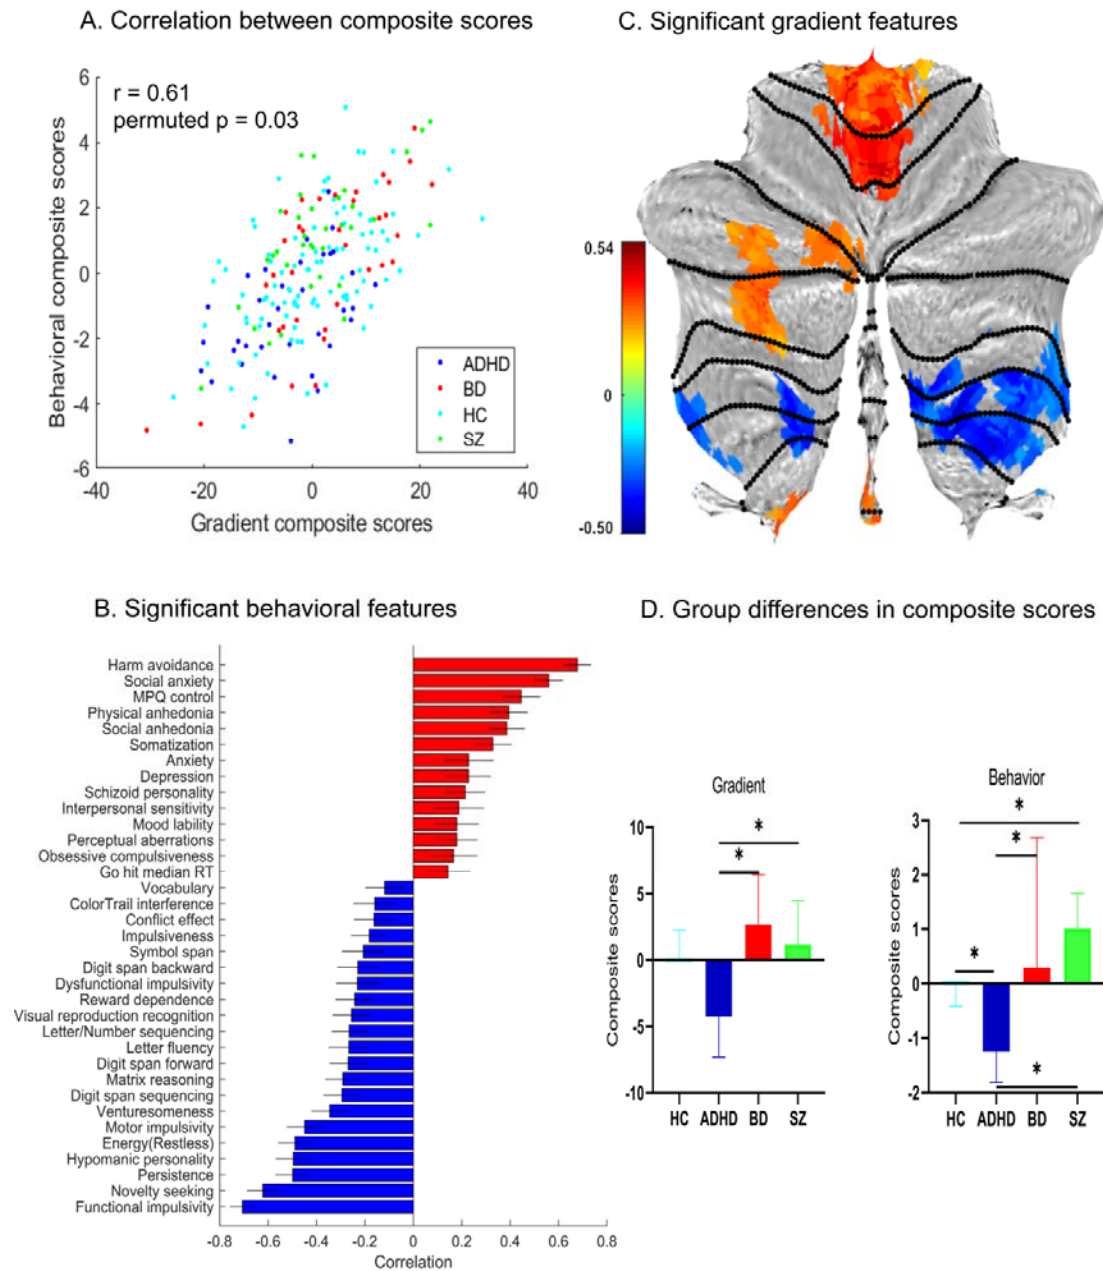

1

2 Figure 4. Latent variable 3: internalizing symptoms. (A) Correlation between cerebellar  
3 connectivity gradient and behavioral composite scores of participants. (B) Significant  
4 behavioral features associated with LV3. The contribution of each behavior is measured by  
5 correlations between participants' behavioral scores and the corresponding behavioral  
6 composite scores. Error bars indicate bootstrapped standard deviations. (C) Significant  
7 gradient pattern associated with LV3. The contribution of each voxel is measured by

1 correlations between participants' cerebellar gradient scores and the corresponding cerebellar  
2 gradient composite scores (FDR correction,  $q < 0.05$ ). (D) Group differences in cerebellar  
3 connectivity gradient and behavioral composite scores. Significant differences are indicated  
4 by asterisks (FDR correction,  $q < 0.05$ ).

5 **LV4: dysfunctional memory**

6 The main contributors of behavior to LV4 included worse performance in multiple memory  
7 domains, as well as with less somatization, interpersonal sensitivity and depression (Figure  
8 5B). LV4 included positive weight in Crus I, II and lobules IX and negative weight in lobule  
9 VI (Figure 5C). There was no significant difference among diagnostic groups (Figure 5D).  
10 There was no significant association between composite scores and medication load or  
11 substance use (Table S5). Our interpretation is that LV4 is associated mainly with  
12 dysfunctional memory (see discussion).

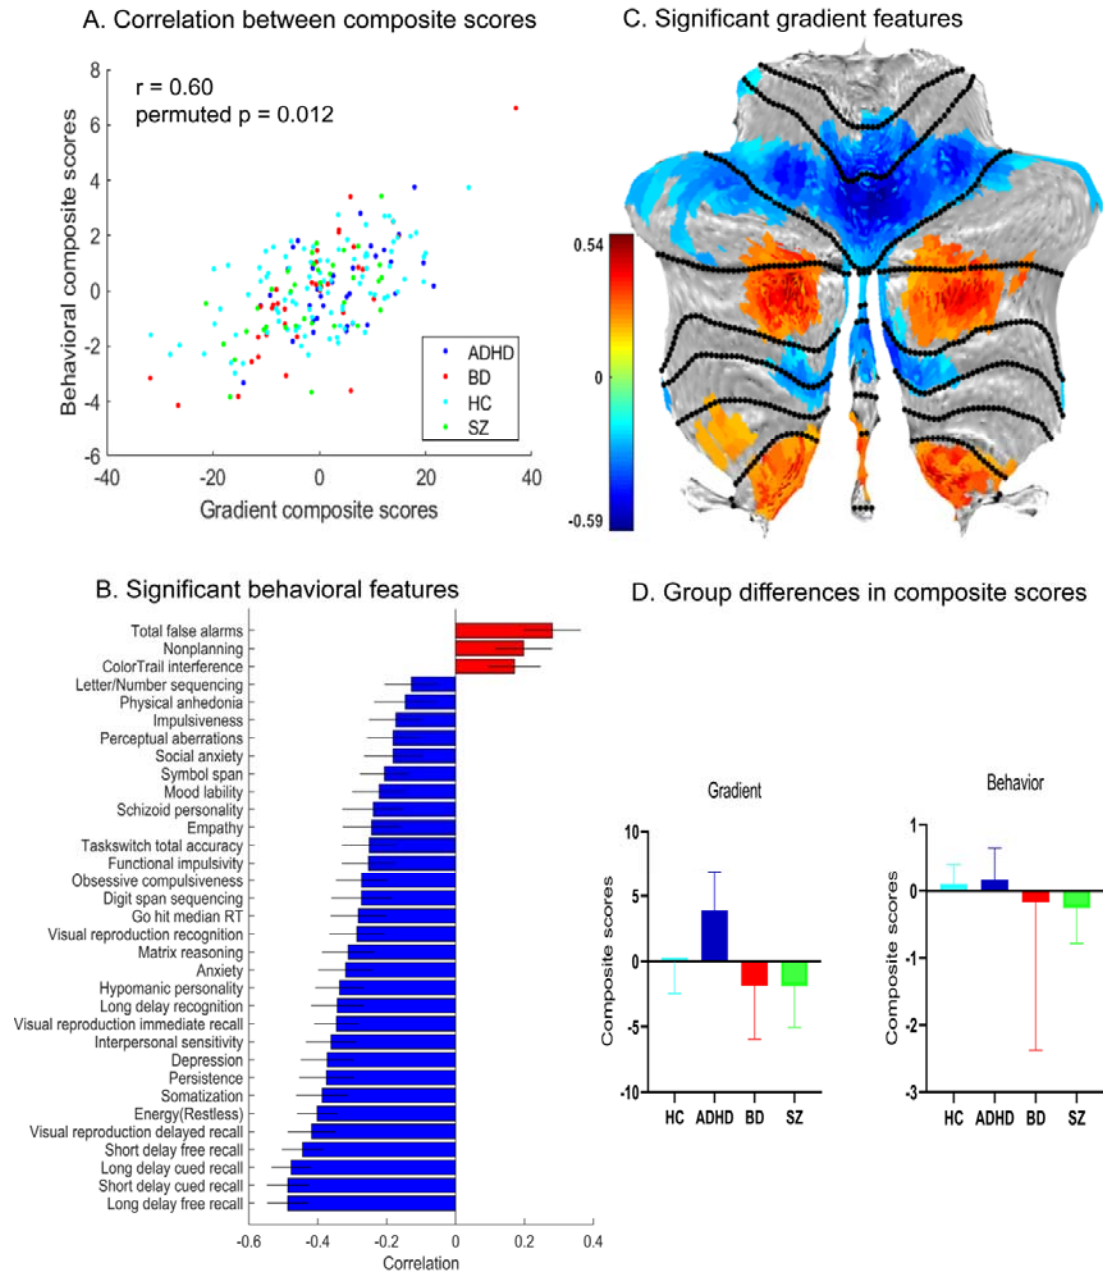

1

2 Figure 5. Latent variable 4: dysfunctional memory. (A) Correlation between cerebellar  
3 connectivity gradient and behavioral composite scores of participants. (B) Significant  
4 behavioral features associated with LV4. The contribution of each behavior is measured by  
5 correlations between participants' behavioral scores and the corresponding behavioral  
6 composite scores. Error bars indicate bootstrapped standard deviations. (C) Significant  
7 gradient pattern associated with LV4. The contribution of each voxel is measured by

1 correlations between participants' cerebellar gradient scores and the corresponding cerebellar  
2 gradient composite scores (FDR correction,  $q < 0.05$ ). (D) Group differences in cerebellar  
3 connectivity gradient and behavioral composite scores. There were no significant differences  
4 among diagnostic groups in LV4 (FDR correction,  $q < 0.05$ ).

## 5 **Control Analyses**

6 Additional control analyses ensured the robustness of the first four LVs to cerebellar gradients  
7 based on cerebellar-cerebral FC, confounding variables, non-Gaussian distributions of the  
8 behavioral data, diagnostic factors (HCs and patients separately), and site factors (each site  
9 separately) (see Supporting Information and Table S3). Results of PLS using only control  
10 individuals or only patients demonstrated moderate to high correlations with original saliences  
11 for the first four LVs. However, correlations dropped to 0.14 and 0.22 for LV5 (Table S3);  
12 hence we did not describe LV5.

13

## 14 **Discussion**

15

16 Although the importance of cerebellar function in mental health and disease is increasingly  
17 recognized, the degree to which cerebellar connectivity is associated with transdiagnostic  
18 behavioral dimensions of psychopathology remains largely unknown. Leveraging a unique  
19 dataset including resting-state fMRI and behavioral assessments spanning clinical, cognitive,  
20 and personality traits, we found robust correlated patterns of cerebellar connectivity gradients  
21 and behavioral measures that could be represented in four transdiagnostic dimensions. Each  
22 dimension was associated with a unique spatial pattern of cerebellar connectivity gradients,  
23 and linked to different clusters of behavioral measures, supporting that individual variability  
24 in cerebellar functional connectivity can capture variability along multiple behavioral  
25 dimensions across psychiatric diagnoses. Our findings highlight the relevance of cerebellar  
26 neuroscience as a central piece for the study and classification of transdiagnostic dimensions

1 of psychopathology – and ultimately for the diagnosis, prognosis, treatment, and prevention of  
2 mental illness.

3 A large body of literature has shown cerebellar functional abnormalities in mental disorders.<sup>2,3</sup>  
4 New trends in psychiatry focus on transdiagnostic dimensions of psychopathology.<sup>4,36</sup> The  
5 present study is the first to link both approaches. Adopting a transdiagnostic approach, three  
6 influential studies analyzing brain structure showed that alterations in cerebellar structure is  
7 associated with broad risk for psychopathology.<sup>14–16</sup> However, these studies focused on  
8 clinical symptoms or cognitive function. The broader set of behavioral phenotypes in the  
9 present study allowed us to explore other dimensions of psychopathology, not constrained  
10 within the limits of clinical symptoms commonly investigated in many transdiagnostic  
11 studies.<sup>15,16,28,30,37–39</sup> Prior cerebellar structure studies using factor analyses suggested the  
12 presence of latent dimensions of psychopathology such as internalizing symptoms,  
13 externalizing symptoms, and psychosis symptoms,<sup>40</sup> as well as a general psychopathology (or  
14 p) factor.<sup>41</sup> While these dimensions are reliable and reproducible, they are entirely derived  
15 from clinical assessments, not informed by brain-based data such as fMRI functional  
16 connectivity. More broadly, previous studies investigating functional connectivity-informed  
17 dimensions of psychopathology often ignore the importance of the cerebellum, e.g., by using  
18 a coarse delineation of the cerebellum with only a few regions of interest to represent the  
19 whole cerebellar information.<sup>29,30</sup> These limitations were overcome in the present  
20 investigation. Further, compared to methods that focus on a single view (such as factor  
21 analysis applied on clinical data), the present study derived behavioral dimensions from co-  
22 varying individual differences in connectivity gradients and behavioral measures. This  
23 approach resonates with the Research Domain Criteria research framework that encourages  
24 the integration of many levels of information.<sup>36</sup>

25 Our study indicates that individual variability in cerebellar functional connectivity gradient  
26 organization captures variability along multiple behavioral dimensions across mental health

1 and disease. The associations with diverse dimensions of psychopathology were expected  
2 based on the consensus that the cerebellum is involved in virtually all aspects of behavior in  
3 health and disease.<sup>1</sup> In 1998, Mesulam proposed that brain regions can be organized along a  
4 gradient ranging from sensory-motor to higher-order brain processes.<sup>33</sup> In line with Mesulam,  
5 most of the variance of cerebellar RSFC resembles a gradient that spans from primary  
6 sensory-motor cortices to high-order transmodal regions of the default-mode network.<sup>31</sup> This  
7 principal gradient may thus represent one fundamental principle driving a hierarchical  
8 organization of cerebellar motor, cognitive, and affective functions. Here we show for the first  
9 time that there is a link between this principal gradient of cerebellar organization and  
10 behavioral measures across individuals with and without diagnoses of cognitive or affective  
11 disease.

12 Functional gradient organizations in the brain have been proposed to reflect an architecture  
13 that optimizes the balance of externally and internally oriented functioning, which is critical  
14 for flexibility of human cognition.<sup>33</sup> In this gradient organization, association areas are located  
15 at maximal distance from regions of primary areas that are functionally specialized for  
16 perceiving and acting in the here and now, supporting cognition and behavior not constrained  
17 by the immediate environment.<sup>33,42-44</sup> The intricate neuronal circuitry of the cerebellum has  
18 been hypothesized to function as a “forward controller,” creating internal models of how a  
19 given behavioral output will dynamically fit with contextual information,<sup>45</sup> which is critical  
20 for monitoring and coordinating information processing in the service of mental  
21 processes.<sup>1,46,47</sup> Thus, information processing in cerebellar circuits associated with multiple  
22 transdiagnostic dimensions of psychopathology shown here may reflect impaired monitoring  
23 and coordination of information—including one’s own thoughts and emotions—necessary to  
24 guide behavior, reflecting an imbalance of externally and internally oriented functioning,  
25 which may serve as possible intermediate phenotypes across mental health and diseases.



1 The most significant finding of the present investigation is the demonstration of an association  
2 between individual variations in cerebellar functional gradient values and multiple behavioral  
3 measures across mental health and diseases. Most behavior indicators were related to more  
4 than one dimension (Figure 2-5C). However, we noticed that the loadings of each behavior to  
5 each dimension can vary greatly, which highlighted the unique and different clusters of  
6 behavioral measures contributing to each dimension. As other brain-behavior association  
7 studies using multivariate analysis based on machine learning,<sup>48</sup> while it is not possible to  
8 provide a definitive characterization of the functional significance of each LV based on the  
9 analyses presented here, we here present one possible line of interpretation.

10 In LV1, greater behavioral composite score was associated with greater behavioral measures  
11 that we interpreted as general psychopathology and higher-cognitive control disabilities  
12 (including impulsiveness, mood lability, dysfunctional impulsivity, anxiety, depression,  
13 somatization, social/physical anhedonia and psychotic symptoms including mania, delusions  
14 and hallucinations). In line with the interpretation of LV1 as general psychopathology, both  
15 cerebellar gradient and behavioral composite scores were higher in all diagnostic groups when  
16 compared with HCs. Factor-analytic studies of multiple symptoms and diagnoses suggest that  
17 the structure of mental disorders can be summarized by three factors: internalizing,  
18 externalizing, and thought disorders.<sup>40</sup> The empirical observation that even these three  
19 transdiagnostic latent factors are positively correlated<sup>49</sup> has given rise to a more radical  
20 hypothesis, which is that there is the general psychopathology (or p) factor,<sup>41</sup> which is thought  
21 to reflect individuals' susceptibility to develop "any and all forms of common  
22 psychopathologies".<sup>50</sup> The p factor has been extended to index functional impairment,  
23 negative affect, emotion dysregulation, and cognitive deficits (e.g., attention and memory  
24 problems) (for a review see<sup>4</sup>). LV1 may thus reflect the p factor widely discussed in  
25 transdiagnostic cohorts.<sup>41</sup>

1 In LV2, greater behavioral composite scores were predominantly correlated with greater  
2 scores in areas related to a general lack of attention regulation including ADHD symptoms  
3 and attention impulsivity. Importantly, patients with ADHD had the highest gradient  
4 composite scores. LV2 might thus capture inattention and impulsivity/hyperactivity  
5 symptoms which characterize ADHD. However, other dimensions such as depression and  
6 schizoid personality were also included in LV2, arguing against a purely inattention-related  
7 nature of LV2.

8 In LV3, greater behavioral composite scores were dominantly correlated with greater  
9 behavioral measures related to internalizing symptoms (including harm avoidance, social  
10 anxiety, control, and anhedonia) and lower externalizing symptoms (including functional and  
11 motor impulsivity, novelty seeking, and hypomanic personality). LV3 may thus reflect an  
12 internalizing vs. externalizing factor.<sup>40,49</sup>

13 LV4 was predominantly associated with negative correlations with behavioral measures, most  
14 strongly in the memory domain (long delay free recall, short delay cued recall, long delay  
15 cued recall, short delay free recall, and visual reproduction delayed recall). LV4 might thus  
16 dominantly reflect dysfunctional memory, although other behavioral domains also played a  
17 significant role in the behavioral composition of LV4 including restlessness, somatization,  
18 and persistence.

19 Notably, Kebets and colleagues investigated RSFC-informed dimensions of psychopathology  
20 in the CNP dataset,<sup>29</sup> focusing on connectivity within and between cerebral and subcortical  
21 areas and derived a general psychopathology variable similar to LV1 in our study (other LVs  
22 were different), indicating that cerebral and cerebellar analyses might offer complementary  
23 information regarding the relationship between brain activity and behavioral measures. Future  
24 studies analyzing both cerebral and cerebellar data might determine whether cerebellar data  
25 offers similar or distinct information regarding the relationship between brain activity and  
26 behavioral measures when compared to analyses of cerebral data.

1 While providing novel evidence for associations between cerebellar hierarchical organization  
2 shown by fMRI and different dimensions of psychopathology, our analyses can provide only  
3 correlational – not causal – inferences between cerebellar function and behavior; future  
4 interventional experiments such as brain stimulation studies may be able to demonstrate not  
5 only an association but also a causal link between cerebellar function as indexed by functional  
6 gradients and behavioral measures. Another limitation that can be addressed in future research  
7 includes the relatively limited range of diagnostic categories in the patient population (ADHD,  
8 SZ, and BD); future research may extend our analyses to include additional patient  
9 populations. The analyses on the impact of medication and substance use were exploratory in  
10 our study; future studies with higher statistical power might adopt stronger statistical  
11 thresholds to study medication and substance use effects.

12 In summary, our results support an association between cerebellar functional connectivity  
13 gradients and multiple behavioral dimensions of psychopathology (general psychopathology,  
14 general lack of attention regulation, internalizing symptoms and dysfunctional memory)  
15 across healthy subjects and patients diagnosed with a variety of mental disorders. These  
16 findings highlight the importance of cerebellar function in transdiagnostic behavioral  
17 dimensions of psychopathology, and contribute to the development of cerebellar neuroscience  
18 as a tool that may significantly contribute to the diagnosis, prognosis, treatment, and  
19 prevention of cognitive and affective illness.

20

## 21 **Methods**

### 22 **Participants**

23 Data from the UCLA Consortium for Neuropsychiatric Phenomics (CNP) dataset <sup>34</sup> were  
24 downloaded from OpenNeuro (<https://openneuro.org/datasets/ds000030/versions/00001>). This  
25 dataset consists of neuroimaging and behavioral data from 272 right-handed participants,  
26 including both HC (n=130) and individuals with neuropsychiatric disorders including SZ

1 (n=50), BD (n=49), and ADHD (n=43). Details about participant recruitment can be found in  
2 the original publication.<sup>34</sup> Written informed consent was obtained from all participants and  
3 related procedures were approved by the Institutional Review Boards at UCLA and the Los  
4 Angeles County Department of Mental Health. Table 1 shows a summary of demographic and  
5 clinical information of the 198 participants who survived image preprocessing quality controls  
6 (see below).

### 7 **Behavioral assessment**

8 The CNP behavioral measures encompass an extensive set of clinical, personality traits,  
9 neurocognitive and neuropsychological scores (Table S1). Behavioral measures were  
10 excluded from the partial least squares (PLS) analysis when data was missing for at least 1  
11 participant among the 198 participants. As a result, we included a set of 55 behavioral and  
12 self-report measures from 19 clinical, personality traits, neurocognitive and  
13 neuropsychological tests in the PLS analysis. Table S2 summarized the behavioral measures  
14 for each group. Excluded behavioral measures were considered in post-hoc analyses (Table  
15 S6).

### 16 **Data Acquisition and Image Preprocessing**

17 Resting-state functional and structural MRI data were collected on two 3T Siemens Trio  
18 scanners at UCLA using the same acquisition parameters. Resting-state functional MRI data  
19 were collected using a T2\*-weighted echoplanar imaging sequence with the following scan  
20 parameters: TR/TE=2000ms/30 ms, flip angle = 90°, matrix 64 × 64, field of view (FOV)  
21 =192\*192 mm<sup>2</sup>, 34 interleaved slices, slice thickness =4 mm, and oblique slice orientation.  
22 The resting fMRI scan lasted 304 s for each participant, and 157 volumes were acquired.  
23 During scanning, all participants were instructed to keep relaxed and keep their eyes open.  
24 Additionally, T1-weighted high-resolution anatomical data were acquired for each participant  
25 using an MPRAGE sequence (scan parameters: TR/TE= 1900 ms/2.26 ms, matrix=256 × 256,

1 FOV=250\*250 mm<sup>2</sup>, sagittal plane, slice thickness =1 mm, 176 slices). The anatomical data  
2 were used to normalize functional data. See Supporting Information for details.  
3 Among the 272 participants, there were seven participants with missing T1 weighted scans,  
4 four participants were missing resting-state functional MRI data scans, and 1 participant had  
5 signal dropout in the cerebellum,<sup>51</sup> thus only data from 260 participants were preprocessed.  
6 All preprocessing steps were consistent with our previous study.<sup>52,53</sup> In brief, the  
7 preprocessing steps included slice timing, realignment, normalization, wavelet despiking of  
8 head motion artifacts, regression of linear trend, Friston 24 head motion parameters, white  
9 matter and CSF signal, and filtering (0.01-0.1 Hz) (see Supporting Information for details).  
10 Because global signal may be an important neuroimaging feature in clinical populations,<sup>54</sup> we  
11 did not conduct global signal regression (GSR) in our main analyses, but GSR was considered  
12 in control analysis. In addition, we excluded 42 participants due to head motion exceeding 1.5  
13 mm or 1.5° rotation or with >10% images showing framewise displacements>0.5mm<sup>55</sup> or  
14 mean FD>0.20mm during MRI acquisition. Further, we further excluded 20 participants  
15 because of incomplete coverage of the cerebellum. This process left 198 participants as a final  
16 sample for our study, among which there were 35 ADHD, 36 BD, 92 HC and 35 SZ  
17 participants.

### 18 **Cerebellar connectivity gradient extraction**

19 We used diffusion map embedding<sup>56</sup> to identify a low-dimensional embedding gradient from  
20 a high-dimensional intra-cerebellar cortex connectivity matrix. Diffusion embedding results in  
21 multiple, continuous maps (“gradients”), which capture the similarity of each voxel’s  
22 functional connections along a continuous space. In other words, this data-driven analysis  
23 results in connectivity gradients that provide a description of the connectome where each  
24 voxel is located along a gradient according to its connectivity pattern. In order to maximize  
25 reliability, reproducibility, and interpretability, we only used the first gradient component in  
26 our analyses. The first gradient (or principal gradient) explains as much of the variance in the

1 data as possible (~30%, Figure 1), represents a well-understood motor-to-supramodal  
2 organizational principle in the cerebellar and cerebro-cerebral connections, and has been  
3 shown to be reproducible at the single subject level.<sup>31</sup> (Guell et al., 2018; note that gradient 2  
4 could not be reproduced as successfully as the principal gradient at the single-subject level)  
5 See Supporting Information for more details. We reported the intra-cerebellar FC gradient  
6 (6242 voxels) as the main result, but also included cerebellar-cerebral FC gradients in control  
7 analyses.

### 8 **Partial Least Squares analysis**

9 We applied PLS to investigate the relationship between cerebellar connectivity gradient and  
10 behavioral measures across diagnostic categories. PLS is a multivariate statistical technique  
11 that derives latent variables (LVs), by finding weighted patterns of variables from two given  
12 data sets that maximally covary with each other.<sup>57,58</sup> Each LV is comprised of a cerebellar  
13 connectivity gradient pattern at voxel level (“gradient saliences”) and a behavioral profile  
14 (“behavioral saliences”). Individual-specific cerebellar gradient and behavioral composite  
15 scores for each LV were obtained by linearly projecting the gradient and behavioral measures  
16 of each participant onto their respective saliences. See Supporting Information for  
17 mathematical details. Because mean framewise displacement (FD) was negatively correlated  
18 with several behavioral measures and there were significant differences in age, sex, education,  
19 site, and mean FD across groups (Table 1), we regressed out these confounding effects from  
20 both behavioral and cerebellar gradient data before PLS analysis.

21 In order to evaluate the significance of the LVs, we applied permutation testing using 1000  
22 permutations to determine the null distribution of the singular values. Considering significant  
23 group differences in various behavioral measures (Table S2), the permutation procedure was  
24 performed within each primary diagnostic group. Our results of interest were the top five LVs  
25 which explained at least 5% of covariance between cerebellar gradients and behavioral

1 measures (see below). We applied a false discovery rate (FDR) correction of  $q < 0.05$  on the  
2 permuted p-values of the five LVs to control for multiple comparisons.

3 To assess the contribution of a given gradient voxel or behavior to a given LV, we computed  
4 correlations between the original measure (gradient voxel or behavior) and the corresponding  
5 composite scores<sup>59,60</sup>. A large correlation (i.e., large weight, positive or negative) for a given  
6 measure (behavioral or gradient voxel) for a given LV indicates greater contribution of the  
7 behavior or gradient voxel to the LV. Then, the confidence intervals for these correlations  
8 were determined a by bootstrapping procedure that generated 500 samples with replacement  
9 from the original gradient and behavioral data. Considering significant diagnostic differences  
10 in many behavioral measures (Table S2), we took diagnostic groups into account within each  
11 bootstrap sample. To identify variables (gradient voxels or clinical measures) that make a  
12 significant contribution to the overall pattern, we calculated Bootstrapped Z scores as the ratio  
13 of each variable's correlation coefficient (i.e., weight) to its bootstrap-estimated standard error.  
14 Then, we converted the Z scores to p values, which were FDR corrected ( $q < 0.05$ ).

15 To test the generalizability of each LV, we used a 10-fold cross-validation of the PLS analysis  
16 with 200 repetitions. Importantly, the cross-validation approach can help to guard against  
17 overfitting that arises from high dimensional neurobiological data.<sup>35</sup> Specifically, first, we  
18 assigned 90% of the participants (within each primary diagnostic group) to the training set  
19 and the remaining 10% of participants (within each primary diagnostic group) to the test set.  
20 For each training set, PLS was used to estimate gradient and behavioral saliences (i.e.,  $U_{\text{train}}$   
21 and  $V_{\text{train}}$ ). Next, the test data were projected onto the gradient and behavioral patterns derived  
22 from the training set. This allowed us to estimate individual-specific gradient and behavior  
23 composite scores and their correlation for the test sample (i.e.  $\text{corr}(X_{\text{test}}U_{\text{train}}, Y_{\text{test}}V_{\text{train}})$ ) for  
24 LVs 1-4. This procedure was repeated 200 times to make sure the results are not biased by the  
25 initial split. Finally, we used a permutation test (behavioral data shuffled 1000 times within  
26 each diagnostic group) to assess the significance of these correlation coefficients.

1 Considering significant group differences in many behavioral measures (Table S2), we took  
2 diagnostic groups into account for the permutation procedure, bootstrapping procedure and  
3 cross-validation in the main text. However, when ignoring diagnostic groups (regarding all  
4 participants as one group), the results remained almost unchanged. See supplementary results  
5 for details.

6 If a given LV was statistically significant, we performed one-way ANOVA to test whether  
7 cerebellar gradient and behavioral composite scores of this LV were different among different  
8 diagnoses, if significant, least significant difference (LSD, in SPSS) post hoc tests were  
9 performed, which would help interpret the significant function of this LV. In addition, we  
10 furthermore tested whether the composite scores for significant LVs were correlated with  
11 confounding factors including age, sex, years of education, head motion, acquisition site,  
12 medication load (number of medications current use) and substance use (number of substances  
13 use, including nicotine, alcohol, cannabis and other psychotropic substances). T tests were  
14 performed for categorical variables, and Pearson's correlations were performed for continuous  
15 measures. Given the exploratory nature of medication and substance use effect analysis in our  
16 study, we only consider the number of medications or substance current use, it should keep  
17 caution when interpreting these results. For binary measures, we used T tests, and for  
18 continuous measures, we used Pearson's correlations.

19 False discovery rate (FDR) correction ( $q < 0.05$ ) was applied to all analyses.

## 20 **Control Analyses**

21 We tested whether LVs were robust to global signal regression, total cerebellar grey matter  
22 volume regression, cerebellar gradients based on cerebellar-cerebral FC, adding confounding  
23 variables (age, sex, education, site, and head motion) into the behavioral data for the PLS  
24 analysis, non-Gaussian distributions of the behavioral data, diagnostic factors (HCs and  
25 patients separately), and site factors (each site separately). To assess the robustness of each  
26 LV, we computed Pearson's correlations between cerebellar gradient (or behavioral) saliences



1 obtained in each control analysis and cerebellar gradient (or behavioral) saliences from the  
2 original PLS analysis. Finally, to confirm that each diagnostic group contributed the same  
3 amount to the overall composite correlations, we used the Fisher r-to-z transformation to  
4 compare the pairwise r-values.<sup>61</sup> See Supporting Information for details.

#### 5 **Data and code availability**

6 All data are freely provided by from the UCLA Consortium for Neuropsychiatric Phenomics  
7 (CNP)<sup>34</sup> available from OpenNeuro  
8 (<https://openneuro.org/datasets/ds000030/versions/00001>). Cerebellar connectivity gradients  
9 were constructed by BrainSpace toolbox (<https://github.com/MICA-MNI/BrainSpace>).<sup>62</sup> We  
10 used the Matlab code from <https://github.com/danizoeller/myPLS><sup>63</sup> and  
11 [https://github.com/ThomasYeoLab/CBIG/tree/master/stable\\_projects/Kebe](https://github.com/ThomasYeoLab/CBIG/tree/master/stable_projects/disorder_subtypes/Kebe)  
12 [ts2019\\_TransdiagnosticComponents](https://github.com/ThomasYeoLab/CBIG/tree/master/stable_projects/disorder_subtypes/Kebe),<sup>29</sup> based on Krishnan et al. (2011)<sup>58</sup> to implement the  
13 PLS calculating.

#### 14 **Acknowledgements**

15 This work was supported by the grant from National Key R&D Program of China  
16 (2018YFA0701400, C Luo), The grants from the National Nature Science Foundation of  
17 China (grant number: 61933003, D Yao, 81771822, C Luo and 81471634, C Luo), The  
18 Project of Science and Technology Department of Sichuan Province (2019YJ0179, C Luo),  
19 and the CAMS Innovation Fund for Medical Sciences (CIFMS) (No.2019-I2M-5-039, D Yao).  
20 We thank Dr Valeria Kebets, National University of Singapore for helpful comments and  
21 methodological discussion. We also thank the CNP investigators for making their data  
22 available for public access. All authors have agreed to this submission. A preprint of the  
23 present manuscript has been archived on the biorxiv.org preprint server  
24 (<https://doi.org/10.1101/2020.06.15.153254>).

#### 25 **Conflict of Interest**

26 The authors declare no conflict of interest.

## 1   **References**

- 2   1.   Schmahmann JD, Guell X, Stoodley CJ, Halko MA. The Theory and Neuroscience of  
3   Cerebellar Cognition. *Annu Rev Neurosci.* 2019;42(1):337-364. doi:10.1146/annurev-  
4   neuro-070918-050258
- 5   2.   Sathyanesan A, Zhou J, Scafidi J, Heck DH, Sillitoe R V., Gallo V. Emerging  
6   connections between cerebellar development, behaviour and complex brain disorders.  
7   *Nat Rev Neurosci.* 2019;20(5):298-313. doi:10.1038/s41583-019-0152-2
- 8   3.   Stoodley CJ. The Cerebellum and Neurodevelopmental Disorders. *Cerebellum.*  
9   2016;15(1):34-37. doi:10.1007/s12311-015-0715-3
- 10  4.   Caspi A, Moffitt TE. All for one and one for all: Mental disorders in one dimension.  
11  *Am J Psychiatry.* 2018;175(9):831-844. doi:10.1176/appi.ajp.2018.17121383
- 12  5.   Kotov R, Krueger, Robert F. Watson D, Achenbach, Thomas M. Althoff RR, et al. The  
13  Hierarchical Taxonomy of Psychopathology (HiTOP): A dimensional alternative to  
14  traditional nosologies. *J Abnorm Psychol.* 2017;126(4):454–477.
- 15  6.   Janiri D, Moser DA, Doucet GE, et al. Shared Neural Phenotypes for Mood and  
16  Anxiety Disorders: A Meta-analysis of 226 Task-Related Functional Imaging Studies.  
17  *JAMA Psychiatry.* 2020;77(2):172-179. doi:10.1001/jamapsychiatry.2019.3351
- 18  7.   Goodkind M, Eickhoff SB, Oathes DJ, et al. Identification of a common  
19  neurobiological substrate for mental illness. *JAMA Psychiatry.* 2015;72(4):305-315.  
20  doi:10.1001/jamapsychiatry.2014.2206
- 21  8.   McTeague LM, Huemer J, Carreon DM, Jiang Y, Eickhoff SB, Etkin A. Identification  
22  of common neural circuit disruptions in cognitive control across psychiatric disorders.  
23  *Am J Psychiatry.* 2017;174(7):676-685. doi:10.1176/appi.ajp.2017.16040400
- 24  9.   Lee SH, Ripke S, Neale BM, et al. Genetic relationship between five psychiatric  
25  disorders estimated from genome-wide SNPs. *Nat Genet.* 2013;45(9):984-994.  
26  doi:10.1038/ng.2711

- 1 10. Jacobi F, Wittchen HU, Höltling C, et al. Prevalence, co-morbidity and correlates of  
2 mental disorders in the general population: Results from the German Health Interview  
3 and Examination Survey (GHS). *Psychol Med.* 2004;34(4):597-611.  
4 doi:10.1017/S0033291703001399
- 5 11. Feczko E, Miranda-Dominguez O, Marr M, Graham AM, Nigg JT, Fair DA. The  
6 Heterogeneity Problem: Approaches to Identify Psychiatric Subtypes. *Trends Cogn Sci.*  
7 2019;23(7):584-601.
- 8 12. Chen J, Patil KR, Weis S, et al. Neurobiological Divergence of the Positive and  
9 Negative Schizophrenia Subtypes Identified on a New Factor Structure of  
10 Psychopathology Using Non-negative Factorization: An International Machine  
11 Learning Study. *Biol Psychiatry.* 2020;87(3):282-293.  
12 doi:10.1016/j.biopsych.2019.08.031
- 13 13. Cuthbert BN. The RDoC framework: Facilitating transition from ICD/DSM to  
14 dimensional approaches that integrate neuroscience and psychopathology. *World*  
15 *Psychiatry.* 2014;13(1):28-35. doi:10.1002/wps.20087
- 16 14. Moberget T, Alnæs D, Kaufmann T, et al. Cerebellar Gray Matter Volume Is  
17 Associated With Cognitive Function and Psychopathology in Adolescence. *Biol*  
18 *Psychiatry.* 2019;86(1):65-75. doi:10.1016/j.biopsych.2019.01.019
- 19 15. Romer AL, Knodt AR, Houts R, et al. Structural alterations within cerebellar circuitry  
20 are associated with general liability for common mental disorders. *Mol Psychiatry.*  
21 2017;(February 2017):1084-1090. doi:10.1038/mp.2017.57
- 22 16. Romer AL, Knodt AR, Sison ML, et al. Replicability of structural brain alterations  
23 associated with general psychopathology: evidence from a population-representative  
24 birth cohort. *Mol Psychiatry.* 2019;86(1):65-75. doi:10.1038/s41380-019-0621-z

- 1 17. Caligiore D, Pezzulo G, Baldassarre G, et al. Consensus Paper: Towards a Systems-  
2 Level View of Cerebellar Function: the Interplay Between Cerebellum, Basal Ganglia,  
3 and Cortex. *Cerebellum*. 2017;16(1):203-229. doi:10.1007/s12311-016-0763-3
- 4 18. Bostan AC, Dum RP, Strick PL. Cerebellar networks with the cerebral cortex and basal  
5 ganglia. *Trends Cogn Sci*. 2013;17(5):241-254.
- 6 19. Kelly RM, Strick PL. Cerebellar Loops with Motor Cortex and Prefrontal Cortex of a  
7 Nonhuman Primate. *J Neurosci*. 2003;23(23):8432-8444. doi:10.1523/jneurosci.23-23-  
8 08432.2003
- 9 20. Brady RO, Gonsalvez I, Lee I, et al. Cerebellar-Prefrontal Network Connectivity and  
10 Negative Symptoms in Schizophrenia. *Am J Psychiatry*. 2019;176(7):512-520.  
11 doi:10.1176/appi.ajp.2018.18040429
- 12 21. Shinn AK, Roh YS, Ravichandran CT, Baker JT, Öngür D, Cohen BM. Aberrant  
13 Cerebellar Connectivity in Bipolar Disorder With Psychosis. *Biol Psychiatry Cogn  
14 Neurosci Neuroimaging*. 2017;2(5):438-448.
- 15 22. Jiang Y, Duan M, Chen X, et al. Aberrant Prefrontal-Thalamic-Cerebellar Circuit in  
16 Schizophrenia and Depression: Evidence from a Possible Causal Connectivity. *Int J  
17 Neural Syst*. 2019;29(5):1850032. doi:10.1142/S0129065718500326
- 18 23. Kucyi A, Hove MJ, Biederman J, Van Dijk KRA, Valera EM. Disrupted functional  
19 connectivity of cerebellar default network areas in attention-deficit/hyperactivity  
20 disorder. *Hum Brain Mapp*. 2015;36(9):3373-3386. doi:10.1002/hbm.22850
- 21 24. Stoodley CJ, D’Mello AM, Ellegood J, et al. Altered Cerebellar connectivity in  
22 autism spectrum disorders and rescue of autism related behaviors in mice. *Nat Neurosci*.  
23 2017;47(3):549-562. doi:10.1097/CCM.0b013e31823da96d.Hydrogen
- 24 25. Cao H, Chén OY, Chung Y, et al. Cerebello-thalamo-cortical hyperconnectivity as a  
25 state-independent functional neural signature for psychosis prediction and  
26 characterization. *Nat Commun*. 2018;9(1):1-9. doi:10.1038/s41467-018-06350-7

- 1 26. Sha Z, Wager TD, Mechelli A, He Y. Common dysfunction of large-scale  
2 neurocognitive networks across psychiatric disorders. *Biol Psychiatry*. 2019;85(5):379-  
3 388.
- 4 27. Buckholtz JW, Meyer-Lindenberg A. Psychopathology and the Human Connectome:  
5 Toward a Transdiagnostic Model of Risk For Mental Illness. *Neuron*. 2012;74(6):990-  
6 1004. doi:10.1016/j.neuron.2012.06.002
- 7 28. Elliott ML, Romer A, Knodt AR, Hariri AR. A Connectome-wide Functional Signature  
8 of Transdiagnostic Risk for Mental Illness. *Biol Psychiatry*. 2018;84(6):452-459.  
9 doi:10.1016/j.biopsych.2018.03.012
- 10 29. Kebets V, Holmes AJ, Orban C, et al. Somatosensory-Motor Dysconnectivity Spans  
11 Multiple Transdiagnostic Dimensions of Psychopathology. *Biol Psychiatry*.  
12 2019;86(10):779-791. doi:10.1016/j.biopsych.2019.06.013
- 13 30. Xia CH, Ma Z, Ciric R, et al. Linked dimensions of psychopathology and connectivity  
14 in functional brain networks. *Nat Commun*. 2018;9(1):1-14. doi:10.1038/s41467-018-  
15 05317-y
- 16 31. Guell X, Schmahmann JD, Gabrieli J DE, Ghosh SS. Functional gradients of the  
17 cerebellum. *Elife*. 2018;7:1-22. doi:10.7554/elife.36652
- 18 32. Margulies DS, Ghosh SS, Goulas A, et al. Situating the default-mode network along a  
19 principal gradient of macroscale cortical organization. *Proc Natl Acad Sci*.  
20 2016;113(44):12574-12579. doi:10.1073/pnas.1608282113
- 21 33. Mesulam M-M. From sensation to cognition. *Brain*. 1998;121(6):1013-1052.
- 22 34. Poldrack RA, Congdon E, Triplett W, et al. A phenome-wide examination of neural  
23 and cognitive function. *Sci Data*. 2016;3:1-12. doi:10.1038/sdata.2016.110
- 24 35. Yarkoni T, Westfall J. Choosing Prediction Over Explanation in Psychology: Lessons  
25 From Machine Learning. *Perspect Psychol Sci*. 2017;12(6):1100-1122.  
26 doi:10.1177/1745691617693393

- 1 36. Insel T, Cuthbert B, Garvey M, et al. Research Domain Criteria (RDoC): Toward a  
2 New Classification Framework for Research on Mental Disorders. *Am J Psychiatry*.  
3 2010;(July):748-751. doi:10.1176/appi.ajp.2010.09091379
- 4 37. Kaczurkin A, Park SS, Sotiras A, et al. Evidence for Dissociable Linkage of  
5 Dimensions of Psychopathology to Brain Structure in Youths. *Am J Psychiatry*.  
6 2019;176(12):1000-1009. doi:10.1016/j.biopsych.2019.03.763
- 7 38. Kaczurkin AN, Moore TM, Calkins ME, et al. Common and dissociable regional  
8 cerebral blood flow differences associate with dimensions of psychopathology across  
9 categorical diagnoses. *Mol Psychiatry*. 2018;23(10):1981-1989.  
10 doi:10.1038/mp.2017.174
- 11 39. Shanmugan S, Wolf DH, Calkins ME, et al. Common and dissociable mechanisms of  
12 executive system dysfunction across psychiatric disorders in youth. *Am J Psychiatry*.  
13 2016;173(5):517-526. doi:10.1176/appi.ajp.2015.15060725
- 14 40. Lahey BB, Krueger RF, Rathouz PJ, Waldman ID, Zald DH. A hierarchical causal  
15 taxonomy of psychopathology across the life span. *Psychol Bull*. 2017;143(2):142-186.
- 16 41. Lahey BB, Applegate B, Hakes JK, Zald DH, Hariri AR, Rathouz PJ. Is there a general  
17 factor of prevalent psychopathology during adulthood? *J Abnorm Psychol*.  
18 2012;121(4):971-977.
- 19 42. Wang P, Kong R, Kong X, et al. Inversion of a large-scale circuit model reveals a  
20 cortical hierarchy in the dynamic resting human brain. *Sci Adv*. 2019;5(1):1-12.  
21 doi:10.1126/sciadv.aat7854
- 22 43. Murphy C, Wang H-T, Konu D, et al. Modes of operation: A topographic neural  
23 gradient supporting stimulus dependent and independent cognition. *Neuroimage*.  
24 2019;186(1):487-496.
- 25 44. Murphy C, Jefferies E, Rueschemeyer SA, et al. Distant from input: Evidence of  
26 regions within the default mode network supporting perceptually-decoupled and

- 1 conceptually-guided cognition. *Neuroimage*. 2018;171(June 2017):393-401.  
2 doi:10.1016/j.neuroimage.2018.01.017
- 3 45. Ito M. Control of mental activities by internal models in the cerebellum. *Nat Rev*  
4 *Neurosci*. 2008;9(4):304-313.
- 5 46. Andreasen NC, Paradiso S, O’Leary DS. “Cognitive dysmetria” as an integrative  
6 theory of schizophrenia: a dysfunction in cortical-subcortical-cerebellar circuitry?  
7 *Schizophr Bull*. 1998;24(2):203–218.  
8 <http://www.psycontent.com/index/LW167M3316708832.pdf%0Ahttp://schizophreniabulletin.oxfordjournals.org/content/24/2/203.full.pdf>.
- 10 47. Schmahmann JD, Sherman JC. The cerebellar cognitive affective syndrome. *Brain*.  
11 1998;121(4):561-579. doi:10.1093/brain/121.4.561
- 12 48. Kohoutová L, Heo J, Cha S, et al. Toward a unified framework for interpreting  
13 machine-learning models in neuroimaging. *Nat Protoc*. 2020;15:1399–1435.  
14 doi:10.1038/s41596-019-0289-5
- 15 49. Wright AGC, Krueger RF, Hobbs MJ, Markon KE, Eaton NR, Slade T. The structure  
16 of psychopathology: Toward an expanded quantitative empirical model. *J Abnorm*  
17 *Psychol*. 2013;122(1):281-294.
- 18 50. Caspi A, Houts RM, Belsky DW, et al. The p Factor: One General Psychopathology  
19 Factor in the Structure of Psychiatric Disorders? *Clin Psychol Sci*. 2014;2(2):119-137.
- 20 51. Gorgolewski KJ, Durnez J, Poldrack RA. Preprocessed Consortium for  
21 Neuropsychiatric Phenomics dataset. *F1000Research*. 2017;6:1262.
- 22 52. Dong D, Duan M, Wang Y, et al. Reconfiguration of Dynamic Functional Connectivity  
23 in Sensory and Perceptual System in Schizophrenia. *Cereb Cortex*. 2018:1-13.  
24 doi:10.1093/cercor/bhy232
- 25 53. Dong D, Luo C, Guell X, et al. Compression of Cerebellar Functional Gradients in  
26 Schizophrenia Debo. *Schizophr Bull*. 2020:1-14. doi:10.1093/schbul/sbaa016

- 1 54. Hahamy A, Calhoun V, Pearlson G, et al. Save the Global: Global Signal Connectivity  
2 as a Tool for Studying Clinical Populations with Functional Magnetic Resonance  
3 Imaging. *Brain Connect.* 2014;4(6):395-403. doi:10.1089/brain.2014.0244
- 4 55. Power JD, Barnes KA, Snyder AZ, Schlaggar BL, Petersen SE. Spurious but  
5 systematic correlations in functional connectivity MRI networks arise from subject  
6 motion. *Neuroimage.* 2012;59(3):2142-2154. doi:10.1016/j.neuroimage.2011.10.018
- 7 56. Coifman RR, Lafon S, Lee AB, et al. Geometric diffusions as a tool for harmonic  
8 analysis and structure definition of data: Multiscale methods. *Proc Natl Acad Sci U S A.*  
9 2005;102(21):7432-7437.
- 10 57. McIntosh AR, Mišić B. Multivariate Statistical Analyses for Neuroimaging Data. *Annu*  
11 *Rev Psychol.* 2013;64:499-525.
- 12 58. Krishnan A, Williams LJ, McIntosh AR, Abdi H. Partial Least Squares (PLS) methods  
13 for neuroimaging: A tutorial and review. *Neuroimage.* 2011;56(2):455-475.  
14 doi:10.1016/j.neuroimage.2010.07.034
- 15 59. Courville T, Thompson B. Use of Structure Coefficients in Published Multiple  
16 Regression Articles:  $\beta$  is not Enough. *Educ Psychol Meas.* 2001;61(2):229-248.  
17 doi:10.1177/0013164401612006
- 18 60. Sherry A, Henson RK. Conducting and Interpreting Canonical Correlation Analysis in  
19 Personality Research: A User-Friendly Primer. *J Pers Assess.* 2005;84(1):37-48.  
20 doi:10.1207/s15327752jpa8401
- 21 61. Diedenhofen B, Musch J. Cocor: A comprehensive solution for the statistical  
22 comparison of correlations. *PLoS One.* 2015;10(4):1-12.  
23 doi:10.1371/journal.pone.0121945
- 24 62. Wael RV de, Benkarim O, Paquola C, et al. BrainSpace: a toolbox for the analysis of  
25 macroscale gradients in neuroimaging and connectomics datasets. *Commun Biol.*  
26 2020;3:1-10.



- 1 63. Zöllner D, Schaer M, Scariati E, Padula MC, Eliez S, Van De Ville D. Disentangling
- 2 resting-state BOLD variability and PCC functional connectivity in 22q11.2 deletion
- 3 syndrome. *Neuroimage*. 2017;149:85-97. doi:10.1016/j.neuroimage.2017.01.064
- 4

1

Table 1. Demographic characteristics of the each diagnostic group

| Variables                                   | ADHD         | BD          | HC          | SZ          | F or $X^2$ | P value               |
|---------------------------------------------|--------------|-------------|-------------|-------------|------------|-----------------------|
| Sample size                                 | 35           | 36          | 92          | 35          |            |                       |
| Age (years, mean(SD))                       | 31.40(10.50) | 34.44(8.91) | 30.50(8.50) | 35.54(8.97) | 3.51       | $1.6 \times 10^{-2}$  |
| Male sex, n(%)                              | 18(51.4)     | 19(52.8)    | 51(55.4)    | 27(77.1)    | 6.54       | $8.8 \times 10^{-2}$  |
| Education (years, mean(SD))                 | 14.43(1.79)  | 14.64(1.94) | 15.26(1.62) | 12.71(1.64) | 18.75      | $1.0 \times 10^{-10}$ |
| Site 1, n(%)                                | 17(48.6)     | 18(50)      | 73(79.3)    | 14(40)      | 23.72      | $2.9 \times 10^{-5}$  |
| Head motion, mean FD, mean(SD)              | 0.069(0.04)  | 0.083(0.05) | 0.066(0.03) | 0.096(0.04) | 6.16       | $5.1 \times 10^{-4}$  |
| Number of current medication use (mean(SD)) | 0.57(1.14)   | 2.50(1.93)  | 0(0)        | 2.20(1.57)  | 57.19      | $1.6 \times 10^{-26}$ |
| Number of substance use (mean(SD))          | 1.31(1.68)   | 2.58(2.09)  | 0.62(1.10)  | 2.46(2.23)  | 17.89      | $2.7 \times 10^{-10}$ |

2

Notes: Group differences were determined by either one-way ANOVA for continuous variables or chi-square tests for categorical variables. FD, framewise displacement; Number of substances use, including nicotine, alcohol, cannabis and other psychotropic substances

3  
4

1  
2  
3  
4  
5  
6  
7  
8  
9  
10  
11  
12  
13  
14  
15  
16  
17  
18  
19  
20  
21  
22  
23  
24  
25  
26  
27

## Supporting Information

### **Linking Cerebellar Functional Gradients to Transdiagnostic Behavioral**

#### **Dimensions of Psychopathology**

Debo Dong, Xavier Guell, Sarah Genon, Yulin Wang, Ji Chen, Simon B. Eickhoff, Cheng Luo\*, Dezhong Yao

#### **Supplemental Methods**

##### **Data acquisition and image preprocessing**

MRI data were acquired two 3T Siemens Trio scanners, located at the Ahmanson-Lovelace Brain Mapping Center (Siemens version syngo MR B15) and the Staglin Center for Cognitive Neuroscience (Siemens version syngo MR B17) at UCLA. Resting-state functional MRI data were collected using a T2\*-weighted echoplanar imaging (EPI) sequence with the following parameters: TR/TE=2000ms/30 ms, flip angle = 90°, matrix 64 × 64, field of view =192\*192 mm<sup>2</sup>, 34 interleaved slices, slice thickness =4 mm, and oblique slice orientation. The resting fMRI scan lasted 304 s for each participant, and 157 volumes were acquired. Participants were asked to remain relaxed and keep their eyes open; they were not presented any stimuli or asked to respond during the scan. Additionally, T1-weighted high-resolution anatomical data were acquired for each participant using an MPRAGE sequence (scan parameters: TR/TE=1900 ms/2.26 ms, matrix=256 × 256, FOV=250\*250 mm<sup>2</sup>, sagittal plane, slice thickness =1 mm, 176 slices). The anatomical data were used to normalize functional data.

Among the 272 participants, there were seven participants with missing T1 weighted scans, four participants were missing resting-state functional MRI data scans, and 1 participant had signal dropout in the cerebellum,<sup>[1]</sup> thus only data from 260 participants<sup>[1]</sup> were preprocessed. All preprocessing steps were carried out using the Data Processing & Analysis for (Resting-State) Brain Imaging (DPABI v4.1<sup>[2]</sup>) and Matlab scripts. Consistent with our previous study,<sup>[3,4]</sup> functional images were (1) discarded in the first five volumes, (2) slice-time corrected, (3) realigned, (4) co-registered to the high-resolution 3D anatomic volume, (5) warped into

1 MNI152 standard space (resampling the voxel size into  $3 \times 3 \times 3$  mm<sup>3</sup>), (6) underwent wavelet  
2 despiking of head motion artifacts<sup>[5]</sup>, (7) underwent regression of motion and non-relevant  
3 signals, including linear trend, Friston 24 head motion parameters,<sup>[6,7]</sup> white matter (CompCor,  
4 5 principal components), and CSF signal (CompCor, 5 principal components<sup>[8]</sup>), and (8) were  
5 filtered using a band-pass filter (0.01-0.1 Hz). Because global signal may be an important  
6 neuroimaging feature in clinical populations,<sup>[9]</sup> and global signal regression has been shown to  
7 induce anticorrelations in resting-state data,<sup>[10]</sup> we did not conduct global signal regression in  
8 our main analyses. Because the topic of global signal regression (GSR) is still controversial,  
9 we considered GSR in a separate control analysis. In addition, we excluded 48 participants  
10 due to head motion exceeding 1.5 mm or 1.5° rotation or with >10% frame-to-frame motion  
11 quantified by framewise displacements (FD>0.5mm, <sup>[11]</sup>) or mean FD > 0.20 mm during MRI  
12 acquisition. Further, we excluded 20 participants because of not full coverage of cerebellum.  
13 This process left 198 participants as a final sample of our study.

#### 14 **Connectivity gradient analyses**

15 In detail, the voxel-level connectivity matrix within cerebellar cortex for each subject was  
16 computed using Fisher Z-transformed Pearson correlations. Based on previous studies,<sup>[12-15]</sup>  
17 we thresholded the rsFC matrix with the top 10% of connections per row retained, whereas all  
18 others were zeroed. The negative connections were zeroed as well. Then, we used cosine  
19 distance to generate a similarity matrix that reflected the similarity of connectivity profiles  
20 between each pair of voxels.

21

22 Then, we used diffusion map embedding<sup>[16]</sup> to identify a low-dimensional embedding from a  
23 high-dimensional connectivity matrix. This methodological strategy has been able to  
24 successfully identify relevant aspects of functional organization in cerebral cortex and  
25 cerebellum in previous studies.<sup>[12,14]</sup> Similar to Principal Component Analysis (PCA),  
26 diffusion map embedding can identify principal gradient components accounting for the

1 variance in descending order. If we applied PCA to the connectivity matrix, each voxel in  
2 cerebellar cortex would be assigned to a particular network with discrete borders. In contrast,  
3 diffusion map embedding allowed us to identify gradients of connectivity patterns from the  
4 similarity matrix. In this way, the result of diffusion embedding is not one single mosaic of  
5 discrete networks, but multiple, continuous maps (gradients), which capture the similarity of  
6 each voxel's functional connections along a continuous space. In other words, this data-driven  
7 analysis results in connectivity gradients that provide a description of the connectome where  
8 each voxel is located along a gradient according to its connectivity pattern. Voxels with  
9 similar connectivity patterns are located close to one another along a given connectivity  
10 gradient. All gradients are orthogonal to each other and capture a portion of data variability in  
11 descending order.

12

13 There is a single parameter  $\alpha$  to control how the density of sampling points affects the  
14 underlying manifold ( $\alpha = 0$ , the maximal influence of sampling density;  $\alpha = 1$ , no influence of  
15 sampling density) in the diffusion map embedding algorithm. Following previous studies,<sup>[12–</sup>  
16 <sup>14]</sup> we set  $\alpha = 0.5$ , which can help retain the global relations between data points in the  
17 embedded space. Then, we used an average connectivity matrix calculated from all  
18 participants to produce a group-level gradient component template. We then performed  
19 Procrustes rotation to align the gradients of each participant to this template, following the  
20 strategy of previous analyses.<sup>[17]</sup> In order to maximize reliability, reproducibility, and  
21 interpretability, we only used the first gradient component in our analyses. The first gradient  
22 (or principal gradient) explains as much of the variance in the data as possible (~30%, Figure  
23 1), represents a well-understood motor-to-supramodal organizational principle in the  
24 cerebellar and cerebro-cerebral connections<sup>[14]</sup> and has been shown to be reproducible at the  
25 single subject level in the cerebellum (Guell et al., 2018; note that gradient 2 could not be  
26 reproduced as successfully as the principal gradient at the single-subject level). The explained

1 variance of principle gradient (30%) was similar to recent reports using diffusion map  
2 embedding analyses in functional connectivity.<sup>[12-14,18]</sup>

3

4 We reported the intra-cerebellar FC gradient (6242 voxels) as the main results, but also we  
5 included the cerebellar-cerebral FC gradients in control analyses. The same calculation  
6 procedures used in intra-cerebellar functional connectivity gradient analysis were performed  
7 for cerebellar-cerebral cortical gradient analysis (cerebellar-cerebral cortical FC matrix).

### 8 **Partial least squares analysis**

9 PLS is a multivariate procedure that seeks maximal correlations between two matrices by  
10 deriving LVs, which are optimal linear combinations of the original matrices.<sup>[19,20]</sup> We applied  
11 PLS to the cerebellar gradient and behavioral measures across diagnostic categories. Given  
12 two matrices,  $X_{n \times p}$  and  $Y_{n \times q}$ , where  $n$  is the number of observations (e.g., participants, here  
13  $n=198$ ),  $p$  and  $q$  are the number of variables (e.g., cerebellar gradient ( $p=6242$ ) and behavioral  
14 features ( $q=55$ ), respectively), after z-scoring  $X$  and  $Y$  (across participants), we calculated the  
15 covariance matrix  $R=Y^T X$ . Then, singular value decomposition (SVD) of  $R=USV^T$  produced  
16 in three low-dimensional latent variables:  $U$  and  $V$  are the singular vectors (called behavioral  
17 and cerebellar gradient saliences, similar to loadings in principal components analysis), while  
18  $S$  is a diagonal matrix containing the singular values. After that, by linearly projecting the  
19 cerebellar gradient and behavioral measures of each participant onto their respective saliences,  
20 we obtained individual-specific cerebellar gradient and behavioral composite scores for each  
21 LV, which reflect the participants' individual cerebellar gradient and behavioral contribution  
22 to each LV (similar to factor scores in principal components analysis). PLS seeks to find  
23 saliences that maximize the covariance between cerebellar gradient and behavioral composite  
24 scores. The covariance explained by each LV is estimated by dividing the squared singular  
25 value by the sum of all squared singular values. Because FD was negatively correlated with  
26 several behavioral measures mainly involving memory function (false discovery rate (FDR),

1  $q < 0.05$ , including long delay free recall, visual reproduction immediate recall, delayed recall  
2 and recognition, matrix reasoning, and letter fluency) and there were significant differences in  
3 age, sex, education, site, and head motion (mean FD) across groups (Table 1), we regressed  
4 them out from both the behavioral and cerebellar gradient data before PLS analysis.

5

## 6 **Control Analyses**

### 7 **Global signal regression**

8

9 Given global signal regression is still the controversial issue in the rsfMRI field, in control  
10 analysis, we conducted global signal regression in the rsfMRI preprocessing to check whether  
11 the GSR significantly affects the four LVs.

12

### 13 **Regressing out cerebellar grey matter volume**

14

15 To test whether the total cerebellar grey matter volume significantly affect the robustness of  
16 the four LVs, we re-computed PLS after regressing out total cerebellar grey matter volume  
17 from gradient features. We used the SUI to calculate the total cerebellar grey matter  
18 volume.<sup>[24]</sup> Briefly, SUI isolates the cerebellum and brainstem, then segments images into  
19 grey matter maps and normalizes these maps to a cerebellar template, ensuring superior  
20 cerebellar alignment across subjects. Normalized cerebellar grey matter maps were modulated  
21 by the Jacobian of the transformation matrix to preserve absolute grey matter volume. We  
22 extracted the summed modulated grey matter value (i.e., a measure of regional volume) for 28  
23 cerebellar lobules defined in the probabilistic SUI Atlas, and regarded resulting value as  
24 total cerebellar grey matter volume.<sup>[25]</sup>

25

### 26 **Cerebellar gradient based on cerebellar-cerebral FC**

1

2 Given the cerebellar functional gradients can be similarly constructed based on intra-  
3 cerebellar FC or cerebellar-cerebral FC in the literature, we also tested cerebellar gradient  
4 based on cerebellar-cerebral FC. Intra-cerebellar connectivity gradient analysis focuses on  
5 exploring the intrinsic organization of the cerebellum without involving its connectivity  
6 profiles with the cerebral hemispheres or other brain structures. The cerebellar-cerebral  
7 cortical gradients emphasize the communication between cerebellar and cerebral cortex <sup>[14]</sup>.

8

### 9 **Including confounds**

10

11 Instead of regressing age, sex, education, site, and head motion (mean FD) out from the data  
12 prior to PLS analysis, we added them to the behavioral data for the new PLS analysis.

13

### 14 **Quantile normalization**

15

16 Because many behavioral measures included in the PLS analysis were non-Gaussian  
17 distribution, to exclude the potential effect on the robustness of LVs, we used quantile  
18 normalization to improve the Gaussian distributions of the behavioral data and re-computed  
19 PLS between the normalized behavioral and cerebellar gradient data.

20

### 21 **Patients and sites factor**

22

23 Furthermore, to ensure that our results were not separately driven by the HCs or by patients,  
24 we recomputed PLS using only control individuals or only patients. Finally, to ensure that  
25 results were not mainly driven by a single site, we recomputed PLS using data of each site  
26 separately.



1

## 2 **Contribution of each diagnostic group to the overall composite correlations**

3

4 To confirm each diagnostic group contributes the same amount to the overall composite  
5 correlations, we used the Fisher r-to-z transformation to compare the pairwise r-values, i.e.,  
6 correlation value between behavioral and gradient composite scores within each diagnostic  
7 group.<sup>[26]</sup>

8

## **Supplemental Results**

9 When ignoring diagnostic groups, i.e., regarding all participants as one group, the results  
10 remained almost unchanged. Specifically, the first four LVs were still significant (LV1:  
11  $r=0.62$ , permuted  $p=0.008$ ; LV2:  $r=0.56$ , permuted  $p=0.005$ ; LV3:  $r=0.61$ , permuted  $p=0.038$ ;  
12 LV4:  $r=0.60$ , permuted  $p=0.01$ ). The significant behavioral and cerebral connectivity gradient  
13 features associated with each LV remained almost unchanged, see figure S2-S5. The 10-fold  
14 cross-validation for the first four LVs was still successful as indicated by significant  
15 correlation between cerebellar gradient and behavioral composite scores in the test folds (LV1,  
16  $r=0.12$ ,  $p=0.0029$ ; LV2,  $r=0.16$ ,  $p=0.0027$ ; LV3,  $r=0.11$ ,  $p=0.0029$ ; LV4,  $r=0.07$ ,  $p=0.0032$ ).

## 17 **Control Analyses**

### 18 **Global signal regression**

19

20 Results were similar to the original PLS. Correlations between the saliences of the new and  
21 the original PLS analysis for the first four LVs ranged from 0.87 to 0.96 (Table S3),  
22 suggesting high correlation.

23

### 24 **Regressing out total cerebellar grey matter volume**

25

1 Results were similar to the original PLS. Correlations between the saliences of the new and  
2 the original PLS analysis for the first four LVs ranged from 0.97 to 1 (Table S3), suggesting  
3 high correlation.

4

#### 5 **Cerebellar gradient based on cerebellar-cerebral FC**

6

7 When using cerebellar gradient based on cerebellar-cerebral FC, results were similar to the  
8 original PLS using the cerebellar gradient based on intra-cerebellar FC. Correlations between  
9 the saliences of the new and the original PLS analysis for the first four LVs ranged from 0.77  
10 to 0.99, suggesting high correlation (Table S3).

11

#### 12 **Including confounds**

13

14 Results were similar to the original PLS, with moderate to high correlations between the  
15 saliences of the new and the original PLS analysis ranging from 0.61 to 0.93 for LVs 1-4  
16 (Table S3).

17

#### 18 **Quantile normalization**

19

20 Results were similar to the original PLS, with high correlations between the saliences of the  
21 new and the original PLS analysis ranging from 0.95 to 0.99 for LVs 1-4 (Table S3).

22

#### 23 **Patients and sites factor**

24

25 When using healthy participants separately in the new PLS analysis, correlations between the  
26 saliences of the new and the original PLS analysis ranged between 0.46-0.83 for the first four

1 LVs, suggesting moderate to high correlation. However, correlations dropped to 0.14 and 0.22  
2 for LV5; hence we did not describe LV5 further. When considering only patients, correlations  
3 between the saliences of the new and the original PLS analysis ranged between 0.55-0.93 for  
4 the first four LVs, suggesting moderate to high correlation (Table S3).

5

6 When using only participants from site 1 in the new PLS analysis, correlations between the  
7 saliences of the new and the original PLS analysis ranged between 0.66-0.96 for the first four  
8 LVs, suggesting high correlation. When considering only participants from site 2, correlations  
9 between the saliences of the new and the original PLS analysis ranged between 0.49-0.97 for  
10 the first four LVs, suggesting moderate to high correlation (Table S3).

11

#### 12 **Contribution of each diagnostic group to the overall composite correlations**

13

14 There was no significant difference between pairs of correlation coefficients (Table S4, FDR  
15  $q > 0.05$  for all pairwise comparisons), suggesting that each diagnostic group contributed  
16 similarly to the overall composite correlations of these four LVs.

17

## 1 **References in this supplement materials**

- 2 [1] K. J. Gorgolewski, J. Durnez, R. A. Poldrack, *F1000Research* **2017**, *6*, 1262.
- 3 [2] C. G. Yan, X. Di Wang, X. N. Zuo, Y. F. Zang, *Neuroinformatics* **2016**, *14*, 339.
- 4 [3] D. Dong, M. Duan, Y. Wang, X. Zhang, X. Jia, Y. Li, F. Xin, D. Yao, C. Luo, *Cereb. Cortex*  
5 **2018**, *1*.
- 6 [4] D. Dong, C. Luo, X. Guell, Y. Wang, H. He, M. Duan, S. B. Eickhoff, *Schizophr. Bull.* **2020**, *1*.
- 7 [5] A. X. Patel, P. Kundu, M. Rubinov, P. S. Jones, P. E. Vértes, K. D. Ersche, J. Suckling, E. T.  
8 Bullmore, *Neuroimage* **2014**, *95*, 287.
- 9 [6] K. J. Friston, S. Williams, R. Howard, R. S. J. Frackowiak, *Magn. Reson. Med.* **1996**, *3*, 346.
- 10 [7] T. D. Satterthwaite, M. A. Elliott, R. T. Gerraty, K. Ruparel, J. Loughhead, M. E. Calkins, S. B.  
11 Eickhoff, H. Hakonarson, R. C. Gur, R. E. Gur, D. H. Wolf, *Neuroimage* **2013**, *64*, 240.
- 12 [8] Y. Behzadi, K. Restom, J. Liau, T. T. Liu, *Neuroimage* **2007**, *37*, 90.
- 13 [9] A. Hahamy, V. Calhoun, G. Pearlson, M. Harel, N. Stern, F. Attar, R. Malach, R. Salomon,  
14 *Brain Connect.* **2014**, *4*, 395.
- 15 [10] K. Murphy, R. M. Birn, D. A. Handwerker, T. B. Jones, P. A. Bandettini, *Neuroimage* **2009**, *44*,  
16 893.
- 17 [11] J. D. Power, K. A. Barnes, A. Z. Snyder, B. L. Schlaggar, S. E. Petersen, *Neuroimage* **2012**, *59*,  
18 2142.
- 19 [12] D. S. Margulies, S. S. Ghosh, A. Goulas, M. Falkiewicz, J. M. Huntenburg, G. Langs, G.  
20 Bezgin, S. B. Eickhoff, F. X. Castellanos, M. Petrides, E. Jefferies, J. Smallwood, *Proc. Natl.*  
21 *Acad. Sci.* **2016**, *113*, 12574.
- 22 [13] S. J. Hong, R. V. de Wael, R. A. I. Bethlehem, S. Larivière, C. Paquola, S. L. Valk, M. P.  
23 Milham, A. Di Martino, D. S. Margulies, J. Smallwood, B. C. Bernhardt, *Nat. Commun.* **2019**,  
24 *10*, 1.
- 25 [14] X. Guell, J. D. Schmahmann, J. DE Gabrieli, S. S. Ghosh, *Elife* **2018**, *7*, 1.
- 26 [15] R. Vos De Wael, S. Larivière, B. Caldairou, S. J. Hong, D. S. Margulies, E. Jefferies, A.  
27 Bernasconi, J. Smallwood, N. Bernasconi, B. C. Bernhardt, *Proc. Natl. Acad. Sci. U. S. A.* **2018**,  
28 *115*, 10154.

- 1 [16] R. R. Coifman, S. Lafon, A. B. Lee, M. Maggioni, B. Nadler, F. Warner, S. W. Zucker, *Proc.*  
2 *Natl. Acad. Sci. U. S. A.* **2005**, *102*, 7432.
- 3 [17] G. Langs, P. Golland, S. S. Ghosh, *Med Image Comput Comput Assist Interv.* **2015**, 313.
- 4 [18] Ş. Bayrak, A. A. Khalil, K. Villringer, J. B. Fiebach, D. S. Margulies, S. Ovadia-Caro,  
5 *NeuroImage Clin.* **2018**, *24*.
- 6 [19] A. R. McIntosh, B. Mišić, *Annu. Rev. Psychol.* **2013**, *64*, 499.
- 7 [20] A. Krishnan, L. J. Williams, A. R. McIntosh, H. Abdi, *Neuroimage* **2011**, *56*, 455.
- 8 [21] T. Courville, B. Thompson, *Educ. Psychol. Meas.* **2001**, *61*, 229.
- 9 [22] A. Sherry, R. K. Henson, *J. Pers. Assess.* **2005**, *84*, 37.
- 10 [23] T. Yarkoni, J. Westfall, *Perspect. Psychol. Sci.* **2017**, *12*, 1100.
- 11 [24] J. Diedrichsen, *Neuroimage* **2006**, *33*, 127.
- 12 [25] T. Moberget, N. T. Doan, D. Alnæs, T. Kaufmann, A. Córdova-Palomera, T. V. Lagerberg, J.  
13 Diedrichsen, E. Schwarz, M. Zink, S. Eisenacher, P. Kirsch, E. G. Jönsson, H. Fatouros-  
14 Bergman, L. Flyckt, G. Pergola, T. Quarto, A. Bertolino, D. Barch, A. Meyer-Lindenberg, I.  
15 Agartz, O. A. Andreassen, L. T. Westlye, *Mol. Psychiatry* **2018**, *23*, 1512.
- 16 [26] B. Diedenhofen, J. Musch, *PLoS One* **2015**, *10*, 1.
- 17

1 **Table S1. Behavior measures used in the present study**

| Scale                                                          | Subscale                                      | Number of subjects available |
|----------------------------------------------------------------|-----------------------------------------------|------------------------------|
| Young Mania Rating Scale-C                                     | Total score                                   | 106                          |
| Hamilton Psychiatric Rating Scale for Depression               | Total score (items 1-17)                      | 106                          |
| Scale for the Assessment of Positive Symptoms                  | Delusions                                     | 72                           |
|                                                                | Hallucinations                                | 72                           |
|                                                                | Bizarre behavior                              | 72                           |
|                                                                | Positive formal thought disorder              | 71                           |
|                                                                | Scale for the Assessment of Negative Symptoms | Alogia                       |
| Brief Psychiatric Rating Scale                                 | Anhedonia                                     | 72                           |
|                                                                | Attention                                     | 72                           |
|                                                                | Avolition                                     | 72                           |
|                                                                | Blunt affect                                  | 72                           |
|                                                                | Positive symptoms                             | 106                          |
| Hopkins Symptom Checklist                                      | Negative symptoms                             | 106                          |
|                                                                | Mania/disorganization                         | 106                          |
|                                                                | Depression/anxiety                            | 106                          |
|                                                                | Anxiety                                       | 198*                         |
| Adult ADHD clinical diagnosis scale                            | Depression                                    | 198*                         |
|                                                                | Obsessive compulsiveness                      | 198*                         |
| Adult Self-Report Scale v.1.1 Screener                         | Somatization                                  | 198*                         |
|                                                                | Interpersonal sensitivity                     | 198*                         |
| Chapman Psychosis-Proneness Scales                             | Inattention                                   | 106                          |
|                                                                | Hyperactivity                                 | 106                          |
| Scale for Traits that Increase Risk for Bipolar II Disorder    | ADHD symptoms (total score)                   | 198*                         |
|                                                                | Perceptual aberrations                        | 198*                         |
|                                                                | Social anhedonia                              | 198*                         |
|                                                                | Physical anhedonia                            | 198*                         |
| Golden & Meehl's Seven MMPI Items Selected by Taxonomic Method | Infrequency                                   | 198*                         |
|                                                                | Mood lability                                 | 198*                         |
|                                                                | Daydreaming                                   | 198*                         |
|                                                                | Energy/activity                               | 198*                         |
| Eckblad and Chapman's Hypomanic Personality Scale              | Social anxiety                                | 198*                         |
|                                                                | Schizoid-type personality                     | 198*                         |
| Temperament and Character Inventory                            | Hypomanic personality                         | 198*                         |
|                                                                | Reward dependence                             | 198*                         |
|                                                                | Persistence                                   | 198*                         |
|                                                                | Novelty seeking                               | 198*                         |

|                                                                   |                                        |      |
|-------------------------------------------------------------------|----------------------------------------|------|
|                                                                   | Harm avoidance                         | 198* |
| Barratt Impulsiveness Scale (BIS-11)                              | Attentional impulsivity                | 198* |
|                                                                   | Motor impulsivity                      | 198* |
|                                                                   | Nonplanning                            | 198* |
| Dickman Functional and Dysfunctional Impulsivity Scale            | Functional impulsivity                 | 198* |
|                                                                   | Dysfunctional impulsivity              | 198* |
| Impulsiveness, Venturesomeness and Empathy Scale                  | Impulsiveness                          | 198* |
|                                                                   | Venturesomeness                        | 198* |
|                                                                   | Empathy                                | 198* |
| Multidimensional Personality Questionnaire (MPQ)—Control subscale | Control                                | 198* |
| Delay Discounting Task                                            | Small rewards                          | 196  |
|                                                                   | Medium rewards                         | 196  |
|                                                                   | Large rewards                          | 196  |
|                                                                   | Total                                  | 196  |
| Balloon Analog Risk Task                                          | Total pumps                            | 189  |
| California Verbal Learning Test (CVLT-II)                         | Short delay free recall                | 198* |
|                                                                   | Short delay cued recall                | 198* |
|                                                                   | Long delay free recall                 | 198* |
|                                                                   | Long delay cued recall                 | 198* |
|                                                                   | Long delay recognition                 | 198* |
| Scene Recognition Task                                            | Encoding accuracy                      | 196  |
|                                                                   | Encoding RT                            | 196  |
|                                                                   | Recall accuracy                        | 196  |
|                                                                   | Recall RT                              | 196  |
| Remember-Know Task                                                | Remember words accuracy                | 168  |
|                                                                   | Remember colors accuracy               | 168  |
|                                                                   | Remember forced recognition 1 feature  | 168  |
|                                                                   | Remember forced recognition 2 features | 168  |
|                                                                   | Remember mean RT                       | 165  |
|                                                                   | Know words accuracy                    | 168  |
|                                                                   | Know colors accuracy                   | 168  |
|                                                                   | Know forced recognition 1 feature      | 168  |
|                                                                   | Know forced recognition 2 features     | 168  |
|                                                                   | Know mean RT                           | 161  |
| Wechsler Memory Scale (WMS-IV)                                    | Symbol span                            | 198* |
|                                                                   | Visual reproduction immediate recall   | 198* |
|                                                                   | Visual reproduction delayed            | 198* |

|                                             |                            |      |
|---------------------------------------------|----------------------------|------|
|                                             | recall                     |      |
|                                             | Visual reproduction        | 198* |
|                                             | recognition                |      |
|                                             | Digit span forward         | 198* |
|                                             | Digit span backward        | 198* |
|                                             | Digit span sequencing      | 198* |
| Spatial Maintenance and Manipulation Task   | Maintenance mean accuracy  | 190  |
|                                             | Maintenance median RT      | 190  |
|                                             | Manipulation mean accuracy | 190  |
|                                             | Manipulation median RT     | 190  |
| Verbal Maintenance and Manipulation Task    | Maintenance mean accuracy  | 189  |
|                                             | Maintenance median RT      | 189  |
|                                             | Manipulation mean accuracy | 189  |
|                                             | Manipulation median RT     | 189  |
| Spatial Capacity Task                       | Load 1 accuracy            | 197  |
|                                             | Load 1 mean RT             | 197  |
|                                             | Load 3 accuracy            | 197  |
|                                             | Load 3 mean RT             | 197  |
|                                             | Load 5 accuracy            | 197  |
|                                             | Load 5 mean RT             | 197  |
|                                             | Load 7 accuracy            | 197  |
|                                             | Load 7 mean RT             | 197  |
|                                             | Maximum capacity           | 197  |
| Verbal Capacity Task                        | Load 3 accuracy            | 197  |
|                                             | Load 3 mean RT             | 197  |
|                                             | Load 5 accuracy            | 197  |
|                                             | Load 5 mean RT             | 197  |
|                                             | Load 7 accuracy            | 197  |
|                                             | Load 7 mean RT             | 197  |
|                                             | Load 9 accuracy            | 197  |
|                                             | Load 9 mean RT             | 197  |
|                                             | Maximum capacity           | 197  |
| Wechsler Adult Intelligence Scale (WAIS-IV) | Matrix reasoning           | 198* |
|                                             | Letter/number sequencing   | 198* |
|                                             | Vocabulary                 | 198* |
| Delis-Kaplan Executive Function System      | English verbal fluency     | 198* |
|                                             | Spanish verbal fluency     | 68   |
| Stroop Color Word Task                      | Interference accuracy      | 198* |
|                                             | Interference RT            | 198* |
| Color Trails Test                           | Interference index         | 198* |
| Stop Signal Task                            | Quantile RT                | 196  |
| Task Switching Task                         | Accuracy                   | 198* |
|                                             | Interference               | 198* |
|                                             | Switching cost             | 198* |
|                                             | Residual switching cost    | 198* |
| Attention Network Task                      | Interference RT            | 197  |
| Continuous Performance                      | Hit rate                   | 198* |



Go/No Go Task

Hits median RT 198\*

False alarm rate 198\*

- 1 Notes: This table lists both behavior measures used in the PLS analysis and measures only  
2 considered in posthoc analyses (Table S3). Behavior measures used in the PLS analysis were  
3 marked with \*.

1 **Table S2. Group differences among the Fifty-five Behavioral measures in**  
 2 **the PLS analysis**

| Scale                                                       | Variables                       | ADHD        | BD           | HC          | SZ          | F     | P value  |
|-------------------------------------------------------------|---------------------------------|-------------|--------------|-------------|-------------|-------|----------|
| Adult Self Report Scale                                     | ADHD symptoms                   | 15.51(3.86) | 13.11(4.98)  | 8.89(2.81)  | 9.34(4.36)  | 32.54 | 4.41E-17 |
| Hopkins Symptom Checklist                                   | Depression                      | 0.67(0.48)  | 0.91(0.63)   | 0.39(0.37)  | 0.72(0.59)  | 11.47 | 5.89E-7  |
|                                                             | Obsessive compulsiveness        | 1.21(0.74)  | 1.10(0.75)   | 0.52(0.44)  | 0.95(0.61)  | 15.93 | 2.68E-9  |
|                                                             | Anxiety                         | 0.47(0.41)  | 0.71(0.62)   | 0.22(0.30)  | 0.71(0.65)  | 15.21 | 6.28E-9  |
|                                                             | Somatization                    | 0.35(0.28)  | 0.63(0.65)   | 0.22(0.24)  | 0.57(0.48)  | 12.75 | 1.22E-7  |
|                                                             | Interpersonal sensitivity       | 0.76(0.55)  | 1.00(0.71)   | 0.40(0.37)  | 0.85(0.61)  | 14.32 | 1.83E-8  |
| Chapman Psychosis-Proneness Scales                          | Infrequency (Careless response) | 0.74(0.95)  | 0.89(1.21)   | 0.67(1.12)  | 1.57(1.50)  | 5.04  | 0.002    |
|                                                             | Perceptual aberrations          | 4.11(3.81)  | 5.08(4.75)   | 2.16(2.67)  | 9.51(8.23)  | 21.30 | 5.70E-12 |
|                                                             | Social anhedonia                | 14.09(8.87) | 15.53(7.63)  | 10.15(7.15) | 15.37(6.24) | 7.27  | 1.21E-4  |
|                                                             | Physical anhedonia              | 13.03(7.94) | 15.47(9.66)  | 11.54(6.63) | 15.71(6.72) | 3.90  | 0.01     |
| Scale for Traits that Increase Risk for Bipolar II Disorder | Mood lability                   | 3.66(2.45)  | 5.14(2.97)   | 2.13(1.71)  | 3.97(2.66)  | 16.98 | 7.84E-10 |
|                                                             | Energy(Restless)                | 3.74(2.06)  | 3.86(2.58)   | 3.05(2.15)  | 4.11(2.14)  | 2.60  | 0.05     |
|                                                             | Daydreaming                     | 3.91(1.42)  | 3.47(1.87)   | 3.14(1.82)  | 3.11(2.07)  | 1.78  | 0.15     |
|                                                             | Social anxiety                  | 3.09(1.63)  | 3.56(1.99)   | 3.01(1.90)  | 3.77(1.73)  | 1.87  | 0.14     |
| Barratt Impulsiveness Scale                                 | Attention impulsivity           | 22.00(3.91) | 19.06(5.52)  | 14.59(3.33) | 17.00(4.63) | 30.31 | 4.08E-16 |
|                                                             | Motor impulsivity               | 26.91(4.01) | 24.61(5.51)  | 21.98(3.74) | 22.71(4.43) | 12.53 | 1.61E-7  |
|                                                             | Nonplanning                     | 28.60(4.39) | 28.33(5.58)  | 23.05(4.38) | 26.74(5.40) | 17.68 | 3.46E-10 |
| Multidimensional Personality Questionnaire                  | MPQ control                     | 10.74(4.97) | 11.72(7.30)  | 18.04(5.06) | 16.23(5.09) | 20.88 | 9.12E-12 |
| Golden & Meehl's Seven MMPI                                 | Schizoid personality            | 3.00(1.37)  | 3.83(1.63)   | 2.42(1.28)  | 3.43(1.63)  | 10.06 | 3.40E-6  |
| Eckblad and Chapman's Hypomanic Personality Scale           | Hypomanic personality           | 24.71(6.85) | 23.25(11.58) | 16.14(7.76) | 19.80(8.73) | 11.25 | 7.76E-7  |
| Dickman Functional and Dysfunctional Impulsivity Scale      | Functional impulsivity          | 7.03(2.93)  | 5.50(3.21)   | 6.60(2.72)  | 5.66(2.80)  | 2.61  | 0.05     |
|                                                             | dysfunctional impulsivity       | 4.83(2.82)  | 5.36(4.28)   | 1.91(2.43)  | 4.06(3.46)  | 14.95 | 8.59E-9  |
| Impulsiveness,                                              | Eysenck                         | 9.11(3.22)  | 9.08(4.54)   | 6.24(3.01)  | 9.23(3.49)  | 11.6  | 4.95E-7  |

|                                           |                                      |              |              |              |               |      |          |
|-------------------------------------------|--------------------------------------|--------------|--------------|--------------|---------------|------|----------|
| Venturesomenes<br>s and Empathy<br>Scale  | impulsiveness                        |              |              |              |               | 1    |          |
|                                           | Eysenck                              | 9.51(1.90)   | 7.78(2.61)   | 8.76(2.46)   | 8.29(2.67)    | 3.32 | 0.02     |
| Temperament<br>and Character<br>Inventory | venturesomeness                      |              |              |              |               |      |          |
|                                           | Eysenck empathy                      | 11.17(2.77)  | 11.14(3.50)  | 10.63(3.13)  | 11.17(2.63)   | 0.49 | 0.69     |
|                                           | Persistence                          | 21.97(7.81)  | 19.11(9.37)  | 23.57(7.21)  | 22.14(6.28)   | 2.98 | 0.03     |
|                                           | Harm avoidance                       | 11.97(6.41)  | 18.06(9.18)  | 11.91(6.50)  | 15.23(7.50)   | 7.44 | 9.66E-5  |
|                                           | Reward dependence                    | 14.86(4.88)  | 14.25(5.11)  | 15.96(4.44)  | 14.69(3.86)   | 1.58 | 0.20     |
| California<br>Verbal Learning<br>Test     | Novelty seeking                      | 25.37(4.90)  | 22.64(7.81)  | 19.09(5.94)  | 18.60(5.56)   | 11.5 | 5.16E-7  |
|                                           | Short delay free recall              | 11.60(2.81)  | 10.69(3.58)  | 12.86(2.32)  | 8.95(3.56)    | 16.6 | 1.13E-9  |
|                                           | Short delay cued recall              | 12.29(2.23)  | 11.81(3.23)  | 13.33(2.10)  | 10.26(2.73)   | 13.5 | 4.65E-8  |
|                                           | Long delay free recall               | 12.20(2.42)  | 11.11(3.50)  | 13.27(2.32)  | 9.57(3.10)    | 17.2 | 5.81E-10 |
|                                           | Long delay cued recall               | 12.71(2.22)  | 12.11(3.47)  | 13.28(2.13)  | 10.23(3.15)   | 14.1 | 2.20E-8  |
|                                           | Long delay recognition               | 3.29(0.65)   | 3.32(0.86)   | 3.37(0.80)   | 2.61(0.95)    | 7.75 | 6.48E-5  |
| Wechsler<br>Memory Scale                  | Visual reproduction immediate recall | 37.80(5.37)  | 35.72(4.96)  | 38.40(4.55)  | 32.74(8.27)   | 9.51 | 6.88E-6  |
|                                           | Visual reproduction delayed recall   | 30.57(8.79)  | 26.81(10.80) | 32.95(8.46)  | 23.54(11.00)  | 9.79 | 4.83E-6  |
|                                           | Visual reproduction recognition      | 6.54(0.85)   | 6.11(1.24)   | 6.51(0.75)   | 5.46(1.75)    | 8.83 | 1.62E-5  |
|                                           | Symbol span                          | 23.09(6.84)  | 21.31(6.47)  | 25.63(6.05)  | 17.26(6.88)   | 15.3 | 5.63E-9  |
|                                           | Digit span forward                   | 11.09(1.92)  | 10.56(2.24)  | 11.11(2.34)  | 8.74(2.15)    | 10.3 | 2.39E-6  |
|                                           | Digit span backward                  | 9.11(2.26)   | 8.92(2.39)   | 9.72(2.41)   | 7.26(2.23)    | 9.32 | 8.70E-6  |
|                                           | Digit span sequencing                | 9.03(1.95)   | 8.61(2.77)   | 9.78(2.39)   | 7.29(1.90)    | 10.2 | 2.74E-6  |
|                                           | Letter/Number sequencing             | 19.97(2.79)  | 19.75(2.71)  | 21.14(2.89)  | 17.83(3.49)   | 10.8 | 1.21E-6  |
|                                           | Vocabulary                           | 42.97(9.18)  | 42.69(10.38) | 43.58(8.59)  | 31.29(9.91)   | 16.0 | 2.27E-9  |
|                                           | Matrix reasoning                     | 20.71(3.88)  | 19.28(4.74)  | 20.87(3.83)  | 15.69(4.98)   | 13.6 | 4.25E-8  |
| Color Trails<br>Test                      | ColorTrail interference              | 1.08(0.65)   | 1.10(0.59)   | 1.10(0.55)   | 1.09(0.62)    | 0.13 | 0.99     |
| English Verbal<br>fluency                 | Letter Fluency                       | 41.03(10.44) | 40.03(13.80) | 41.79(12.02) | 30.37(8.14)   | 8.75 | 1.81E-5  |
| Task Switching                            | Taskswitch total accuracy            | 0.96(0.027)  | 0.96(0.0350) | 0.97(0.027)  | 0.94(0.074)   | 5.49 | 0.001    |
|                                           | Taskswitch interference              | 57.77(88.49) | 68.13(74.78) | 42.76(63.76) | 57.76(147.76) | 0.77 | 0.52     |

|                                           |                                 |                |                |                |                |      |         |
|-------------------------------------------|---------------------------------|----------------|----------------|----------------|----------------|------|---------|
| Continuous<br>Performance<br>Go/NoGo Task | Taskswitch switch cost          | 274.16(120.28) | 259.64(137.10) | 262.40(145.15) | 278.56(202.63) | 0.15 | 0.93    |
|                                           | Taskswitch residual switch cost | 79.01(121.13)  | 54.58(108.74)  | 54.69(105.19)  | 126.77(164.35) | 3.30 | 0.02    |
|                                           | Total go hit                    | 321.17(6.59)   | 319.44(8.61)   | 322.88(1.64)   | 317.91(12.20)  | 5.14 | 0.002   |
|                                           | Total false alarms              | 13.91(8.20)    | 12.78(7.21)    | 12.78(6.71)    | 13.29(6.54)    | 0.25 | 0.86    |
| Stroop Color<br>Word Task                 | Hits median RT                  | 360.36(54.74)  | 387.50(60.31)  | 350.75(43.18)  | 386.59(51.09)  | 7.15 | 1.40E-4 |
|                                           | Conflict effect                 | -0.042(0.064)  | -0.020(0.041)  | 0.035(0.056)   | 0.051(0.062)   | 1.89 | 0.13    |
|                                           | Conflict effect RT              | 141.20(69.90)  | 128.87(60.23)  | 122.97(70.67)  | 122.55(75.54)  | 0.64 | 0.59    |

1 Notes: Mean (standard deviation) values are shown for each group. RT=reaction time.

1 **Table S3. Absolute correlations between cerebellar gradient (or behavioral)**  
 2 **salience obtained in control analyses and cerebellar gradient (or**  
 3 **behavioral) saliences from the original PLS analysis.**  
 4

|                                                 | Latent dimension | GS R | Regressing out cerebellar grey matter volume | Cerebellar-cerebral Gradient | Confounds included | Behavior normalized | Controls Only | Patients only | Site #1 | Site #2 |
|-------------------------------------------------|------------------|------|----------------------------------------------|------------------------------|--------------------|---------------------|---------------|---------------|---------|---------|
| Correlations with original gradient saliences   | LV #1            | 0.91 | 1                                            | 0.83                         | 0.77               | 0.99                | 0.46          | 0.61          | 0.76    | 0.68    |
|                                                 | LV #2            | 0.92 | 0.97                                         | 0.85                         | 0.85               | 0.98                | 0.70          | 0.55          | 0.79    | 0.76    |
|                                                 | LV #3            | 0.87 | 0.98                                         | 0.77                         | 0.89               | 0.97                | 0.66          | 0.77          | 0.75    | 0.49    |
|                                                 | LV #4            | 0.91 | 0.99                                         | 0.81                         | 0.62               | 0.97                | 0.57          | 0.67          | 0.66    | 0.69    |
|                                                 | LV #5            | 0.83 | 1                                            | 0.82                         | 0.58               | 0.95                | <b>0.14</b>   | 0.55          | 0.52    | 0.45    |
| Correlations with original behavioral saliences | LV #1            | 0.98 | 1                                            | 0.99                         | 0.93               | 1                   | 0.83          | 0.82          | 0.96    | 0.97    |
|                                                 | LV #2            | 0.98 | 0.98                                         | 0.96                         | 0.84               | 0.97                | 0.80          | 0.59          | 0.90    | 0.89    |
|                                                 | LV #3            | 0.99 | 0.99                                         | 0.93                         | 0.93               | 0.97                | 0.87          | 0.93          | 0.89    | 0.70    |
|                                                 | LV #4            | 0.99 | 0.99                                         | 0.92                         | 0.61               | 0.95                | 0.71          | 0.64          | 0.74    | 0.76    |
|                                                 | LV #5            | 0.87 | 1                                            | 0.94                         | 0.63               | 0.95                | <b>0.22</b>   | 0.69          | 0.63    | 0.61    |

5

6

1 **Table S4. Comparisons between pairs of correlation coefficients between**  
 2 **gradient composite scores and behavioral composite scores**  
 3

| <b>LV1(separated group-1)</b>                                                                                                                                                                                                                                                                  | <b>LV2(separated group-1)</b>                                                                                                                                                                                                                                                  | <b>LV3(separated group-1)</b>                                                                                                                                                                                                                                                                 | <b>LV4(separated group-1)</b>                                                                                                                                                                                                                                                  |
|------------------------------------------------------------------------------------------------------------------------------------------------------------------------------------------------------------------------------------------------------------------------------------------------|--------------------------------------------------------------------------------------------------------------------------------------------------------------------------------------------------------------------------------------------------------------------------------|-----------------------------------------------------------------------------------------------------------------------------------------------------------------------------------------------------------------------------------------------------------------------------------------------|--------------------------------------------------------------------------------------------------------------------------------------------------------------------------------------------------------------------------------------------------------------------------------|
| r_hc=0.6099;<br>r_patients=0.5696<br>z = 0.4272, p = 0.6692                                                                                                                                                                                                                                    | r_hc=0.5415;r_patients=0.5943<br>z = -0.5390, p = 0.5899                                                                                                                                                                                                                       | r_hc=0.5548;r_patients<br>=0.6571<br>z = -1.1222, p = 0.2618                                                                                                                                                                                                                                  | r_hc=0.5466;r_patients=0.6667<br>z = -1.3216, p = 0.1863                                                                                                                                                                                                                       |
| <b>LV1(separated group-2)</b>                                                                                                                                                                                                                                                                  | <b>LV2(separated group-2)</b>                                                                                                                                                                                                                                                  | <b>LV3(separated group-2)</b>                                                                                                                                                                                                                                                                 | <b>LV4(separated group-2)</b>                                                                                                                                                                                                                                                  |
| r_hc=0.6099;<br>r_sz=0.4539<br>r_bd=0.7114;<br>r_adhd=0.5740<br>hc-sz: z = 1.0633, p =<br>0.2877;<br>hc-bd: z = -0.8893, p =<br>0.3738<br>hc-adhd: z = 0.2683, p =<br>0.7885<br>sz-bd: z = -1.6139, p =<br>0.1065<br>sz-adhd: z = -0.6555, p =<br>0.5122<br>bd-adhd: z = 0.9534, p =<br>0.3404 | r_hc=0.5415; r_sz=0.7511<br>r_bd=0.5103; r_adhd=0.6037<br>hc-sz: z = -1.7912, p = 0.0733<br>hc-bd: z = 0.2117, p = 0.8324<br>hc-adhd: z = -0.4496, p =<br>0.6530<br>sz-bd: z = 1.6620, p = 0.0965<br>sz-adhd: z = 1.1061, p =<br>0.2687<br>bd-adhd: z = -0.5474, p =<br>0.5841 | r_hc=0.5548;<br>r_sz=0.6782<br>r_bd=0.7275;<br>r_adhd=0.4116<br>hc-sz: z = -0.9727, p =<br>0.3307<br>hc-bd: z = -1.4627, p =<br>0.1436<br>hc-adhd: z = 0.9109, p =<br>0.3624<br>sz-bd: z = -0.3935, p =<br>0.6940<br>sz-adhd: z = 1.5529, p =<br>0.1204<br>bd-adhd: z = 1.9583, p =<br>0.0502 | r_hc=0.5466; r_sz=0.5607<br>r_bd=0.8036; r_adhd=0.4845<br>hc-sz: z = -0.0986, p = 0.9214<br>hc-bd: z = -2.4296, p = 0.0151<br>hc-adhd: z = 0.4108, p =<br>0.6812<br>sz-bd: z = -1.9139, p = 0.0556<br>sz-adhd: z = 0.4200, p =<br>0.6745<br>bd-adhd: z = 2.3372, p =<br>0.0194 |

4 Notes: There was no significant difference between pairs of correlation coefficients (FDR  $q >$   
 5 0.05 for all pairwise comparisons)  
 6

1 **Table S5. Associations between cerebellar gradient or behavior composite scores and**  
 2 **confounding factors**

|                    | LV1                       |               |                             |               | LV2                       |      |                             |      | LV3                       |             |                             |               | LV4                       |      |                             |      |
|--------------------|---------------------------|---------------|-----------------------------|---------------|---------------------------|------|-----------------------------|------|---------------------------|-------------|-----------------------------|---------------|---------------------------|------|-----------------------------|------|
|                    | Gradient composite scores |               | Behavioral composite scores |               | Gradient composite scores |      | Behavioral composite scores |      | Gradient composite scores |             | Behavioral composite scores |               | Gradient composite scores |      | Behavioral composite scores |      |
|                    | r/t                       | p             | r/t                         | p             | r/t                       | p    | r/t                         | p    | r/t                       | p           | r/t                         | p             | r/t                       | p    | r/t                         | p    |
| Age                | 0                         | 1             | 0                           | 1             | 0                         | 1    | 0                           | 1    | 0                         | 1           | 0                           | 1             | 0                         | 1    | 0                           | 1    |
| Sex                | 0                         | 1             | 0                           | 1             | 0                         | 1    | 0                           | 1    | 0                         | 1           | 0                           | 1             | 0                         | 1    | 0                           | 1    |
| Education          | 0                         | 1             | 0                           | 1             | 0                         | 1    | 0                           | 1    | 0                         | 1           | 0                           | 1             | 0                         | 1    | 0                           | 1    |
| Site               | 0                         | 1             | 0                           | 1             | 0                         | 1    | 0                           | 1    | 0                         | 1           | 0                           | 1             | 0                         | 1    | 0                           | 1    |
| Motion             | 0                         | 1             | 0                           | 1             | 0                         | 1    | 0                           | 1    | 0                         | 1           | 0                           | 1             | 0                         | 1    | 0                           | 1    |
| Total brain volume | -0.04                     | 0.59          | -0.08                       | 0.26          | -0.03                     | 0.63 | 0.05                        | 0.48 | -0.05                     | 0.44        | -0.07                       | 0.31          | 0.02                      | 0.80 | 0.04                        | 0.62 |
| Cerebellar volume  | -0.10                     | 0.20          | -0.04                       | 0.55          | 0.15                      | 0.03 | 0.17                        | 0.02 | -0.06                     | 0.38        | -0.10                       | 0.18          | 0.07                      | 0.32 | 0.02                        | 0.73 |
| Medication load    | <b>0.35</b>               | <b>4.7E-7</b> | <b>0.39</b>                 | <b>1.2E-8</b> | -0.09                     | 0.19 | 0.07                        | 0.30 | <b>0.18</b>               | <b>0.01</b> | <b>0.28</b>                 | <b>6.2E-5</b> | -0.07                     | 0.30 | 0.06                        | 0.43 |
| Substance use      | 0.12                      | 0.08          | 0.10                        | 0.16          | 0.07                      | 0.35 | 0.15                        | 0.03 | -0.13                     | 0.06        | -0.10                       | 0.15          | -0.03                     | 0.65 | -0.07                       | 0.35 |

3 Notes: T tests were performed for binary measures, and Pearson's correlations were  
 4 performed for continuous measures. Bold refers to significant associations that survived FDR  
 5 correction ( $q < 0.05$ ).

1 **Table S6. Correlations between subjects' behavioral measures and their**  
 2 **behavioral composite scores**

| LV#1                                  |      |      | LV#2                                        |      |      |
|---------------------------------------|------|------|---------------------------------------------|------|------|
|                                       | r    | SD   |                                             | r    | SD   |
| <b>Eysenck impulsiveness</b>          | 0.70 | 0.04 | <b>ADHD symptoms</b>                        | 0.60 | 0.04 |
| <b>Dysfunctional impulsivity</b>      | 0.66 | 0.04 | <b>Attention impulsivity</b>                | 0.57 | 0.05 |
| <b>Mood lability</b>                  | 0.60 | 0.04 | <b>Depression</b>                           | 0.55 | 0.05 |
| <b>Nonplanning</b>                    | 0.56 | 0.04 | <b>Mood lability</b>                        | 0.53 | 0.05 |
| <b>Perceptual aberrations</b>         | 0.56 | 0.06 | <b>Interpersonal sensitivity</b>            | 0.53 | 0.05 |
| <b>Attention impulsivity</b>          | 0.54 | 0.05 | <b>Attention severity*</b>                  | 0.52 | 0.09 |
| <b>Obsessive compulsiveness</b>       | 0.54 | 0.05 | <b>Obsessive compulsiveness</b>             | 0.52 | 0.05 |
| <b>Anxiety</b>                        | 0.53 | 0.06 | <b>Daydreaming</b>                          | 0.52 | 0.05 |
| <b>Interpersonal sensitivity</b>      | 0.52 | 0.05 | <b>Vocabulary</b>                           | 0.49 | 0.05 |
| <b>Hypomanic peronality</b>           | 0.52 | 0.05 | <b>Schizoid personality</b>                 | 0.47 | 0.05 |
| <b>Depression</b>                     | 0.47 | 0.05 | <b>Harm avoidance</b>                       | 0.47 | 0.05 |
| <b>ADHD symptoms</b>                  | 0.45 | 0.05 | <b>Motor impulsivity</b>                    | 0.47 | 0.05 |
| <b>Somatization</b>                   | 0.42 | 0.07 | <b>Social anxiety</b>                       | 0.46 | 0.06 |
| <b>Social anhedonia</b>               | 0.39 | 0.06 | <b>Dysfunctional impulsivity</b>            | 0.46 | 0.05 |
| <b>Motor impulsivity</b>              | 0.39 | 0.05 | <b>Nonplanning</b>                          | 0.45 | 0.05 |
| <b>Energy(Restless)</b>               | 0.37 | 0.06 | <b>Anxiety</b>                              | 0.43 | 0.06 |
| <b>Infrequency(careless response)</b> | 0.37 | 0.07 | <b>HAMD_depression*</b>                     | 0.42 | 0.09 |
| <b>Physical anhedonia</b>             | 0.37 | 0.07 | <b>Hyperactivity severity*</b>              | 0.39 | 0.09 |
| <b>YMRC_mania*</b>                    | 0.36 | 0.10 | <b>Matrix reasoning</b>                     | 0.39 | 0.07 |
| <b>Depression/anxiety*</b>            | 0.35 | 0.10 | <b>Letter fluency</b>                       | 0.39 | 0.06 |
| <b>Schizoid personality</b>           | 0.34 | 0.06 | <b>Digit span backward</b>                  | 0.38 | 0.06 |
| <b>HAMD_depression*</b>               | 0.33 | 0.10 | <b>Somatization</b>                         | 0.37 | 0.07 |
| <b>Delusions*</b>                     | 0.32 | 0.13 | <b>Depression/anxiety*</b>                  | 0.36 | 0.09 |
|                                       |      |      | <b>Remember words accuracy*</b>             | 0.36 | 0.07 |
| <b>Novelty seeking</b>                | 0.31 | 0.06 | <b>Long delay recognition</b>               | 0.36 | 0.07 |
| <b>Eysenck empathy</b>                | 0.30 | 0.05 | <b>Digit span forward</b>                   | 0.34 | 0.06 |
| <b>Total false alarms</b>             | 0.28 | 0.06 | <b>Eysenck impulsiveness</b>                | 0.34 | 0.05 |
| <b>Mania/disorganization*</b>         | 0.27 | 0.10 | <b>Novelty seeking</b>                      | 0.33 | 0.06 |
| <b>Positive formal thought*</b>       | 0.25 | 0.13 | <b>Social anhedonia</b>                     | 0.32 | 0.06 |
| <b>Social anxiety</b>                 | 0.25 | 0.06 | <b>Long delay cued recall</b>               | 0.32 | 0.07 |
| <b>Positive symptoms*</b>             | 0.25 | 0.10 | <b>Visual reproduction immediate recall</b> | 0.31 | 0.07 |
|                                       |      |      | <b>Digit span sequencing</b>                | 0.31 | 0.05 |
| <b>Hallucinations*</b>                | 0.24 | 0.13 | <b>Verbal manipulation accuracy*</b>        | 0.29 | 0.06 |
| <b>Harm avoidance</b>                 | 0.24 | 0.06 | <b>Symbol span</b>                          | 0.28 | 0.05 |
|                                       |      |      | <b>Hypomanic peronality</b>                 | 0.28 | 0.06 |
| <b>Attention*</b>                     | 0.24 | 0.12 | <b>Mania/disorganization*</b>               | 0.27 | 0.10 |
| <b>Daydreaming</b>                    | 0.22 | 0.06 | <b>Short delay cued recall</b>              | 0.27 | 0.08 |
| <b>Attention severity*</b>            | 0.18 | 0.10 | <b>Long delay free recall</b>               | 0.26 | 0.07 |
| <b>Anhedonia*</b>                     | 0.17 | 0.12 | <b>Visual reproduction recognition</b>      | 0.25 | 0.08 |
| <b>Hyperactivity severity*</b>        | 0.17 | 0.10 | <b>Taskswitch total accuracy</b>            | 0.24 | 0.07 |
| <b>Avolition*</b>                     | 0.16 | 0.12 |                                             |      |      |
| <b>Spatial capacity load 3 RT*</b>    | 0.14 | 0.07 |                                             |      |      |
| <b>Bizarre behavior*</b>              | 0.12 | 0.12 |                                             |      |      |



|                                        |       |      |                                                |      |      |
|----------------------------------------|-------|------|------------------------------------------------|------|------|
| ANT_Interference RT*                   | 0.10  | 0.07 | <b>Visual reproduction</b>                     |      |      |
| Verbal capacity load 5 RT*             | 0.09  | 0.07 | <b>delayed recall</b>                          | 0.24 | 0.08 |
| Vpatial capacity load 3 RT*            | 0.09  | 0.06 | <b>Short delay free recall</b>                 | 0.23 | 0.07 |
| Delay discounting medium rewards*      | 0.09  | 0.07 | <b>Know forced recognition 2 features*</b>     | 0.23 | 0.07 |
| Taskswitch interference                | 0.09  | 0.07 | <b>Scene recognition encoding accuracy*</b>    | 0.23 | 0.06 |
| Delay discounting small rewards*       | 0.09  | 0.07 | <b>Letter/Number sequencing</b>                | 0.22 | 0.06 |
| Alogia*                                | 0.08  | 0.12 | <b>Scene recognition recall accuracy*</b>      | 0.22 | 0.06 |
| Delay discounting total rewards*       | 0.08  | 0.07 | <b>BART_total pumps*</b>                       | 0.21 | 0.07 |
| Spatial maintenance RT*                | 0.08  | 0.07 | <b>Verbal maintenance accuracy*</b>            | 0.21 | 0.06 |
| Scene recognition encoding RT*         | 0.08  | 0.07 | <b>Remember forced recognition 2 features*</b> | 0.20 | 0.07 |
| Delay discounting large rewards*       | 0.07  | 0.07 | <b>Spatial capacity load 7 accuracy*</b>       | 0.20 | 0.06 |
| Blunt affect*                          | 0.07  | 0.12 | <b>YMRC_mania*</b>                             | 0.19 | 0.10 |
| Know forced recognition 1 feature*     | 0.07  | 0.07 | <b>Spatial maintenance accuracy*</b>           | 0.19 | 0.07 |
| Negative symptoms*                     | 0.07  | 0.10 | <b>Know words accuracy*</b>                    | 0.19 | 0.07 |
| Taskswitch residSwitchCost             | 0.07  | 0.08 | <b>Eysenck empathy</b>                         | 0.18 | 0.06 |
| ColorTrail interference                | 0.06  | 0.07 | Physical anhedonia                             | 0.15 | 0.08 |
| Spatial capacity load 1 RT*            | 0.05  | 0.07 | <b>Verbal capacity load 7 accuracy*</b>        | 0.15 | 0.07 |
| Spatial capacity load 5 RT*            | 0.05  | 0.07 | <b>Know colors accuracy*</b>                   | 0.14 | 0.07 |
| Scene recognition recall RT*           | 0.04  | 0.07 | <b>Verbal maximum capacity*</b>                | 0.13 | 0.06 |
| Spatial capacity load 7 RT*            | 0.02  | 0.07 | <b>Spatial maximum capacity*</b>               | 0.13 | 0.07 |
| Verbal maintenance RT*                 | 0.02  | 0.07 | Verbal capacity load 9 RT*                     | 0.12 | 0.07 |
| Stop signal quantile RT*               | 0.01  | 0.07 | <b>Perceptual aberrations</b>                  | 0.12 | 0.06 |
| Verbal manipulation RT*                | 0.01  | 0.07 | Verbal capacity load 3 accuracy*               | 0.12 | 0.07 |
| Functional impulsivity                 | 0.01  | 0.07 | Go hit median RT                               | 0.11 | 0.08 |
| Remember forced recognition 1 feature* | 0.00  | 0.07 | Remember mean RT*                              | 0.11 | 0.07 |
| Remember mean RT*                      | 0.00  | 0.07 | Remember colors accuracy*                      | 0.10 | 0.07 |
| Spatial manipulation RT*               | -0.02 | 0.06 | Spatial capacity load 3 accuracy*              | 0.10 | 0.07 |
| Eysenck venturesomeness                | -0.02 | 0.07 | Bizarre behavior*                              | 0.10 | 0.10 |
| Know colors accuracy*                  | -0.03 | 0.07 | Taskswitch interference                        | 0.10 | 0.07 |
| Verbal capacity load 7 RT*             | -0.03 | 0.07 | Conflict effect RT                             | 0.10 | 0.07 |
| Taskswitch switch cost                 | -0.05 | 0.07 | Spatial manipulation accuracy*                 | 0.09 | 0.06 |
| Conflict effect RT                     | -0.07 | 0.06 | Anhedonia*                                     | 0.09 | 0.11 |
|                                        |       |      | Know forced recognition 1 feature*             | 0.09 | 0.07 |

|                                                |       |      |                                        |       |      |
|------------------------------------------------|-------|------|----------------------------------------|-------|------|
|                                                |       |      | Verbal capacity load 9 accuracy*       | 0.08  | 0.07 |
| Persistence                                    | -0.08 | 0.07 | Delusions*                             | 0.08  | 0.09 |
| Go hit median RT                               | -0.09 | 0.07 | Verbal capacity load 7 RT*             | 0.08  | 0.06 |
| Know mean RT*                                  | -0.10 | 0.08 | Spatial capacity load 1 accuracy*      | 0.04  | 0.07 |
| <b>Remember forced recognition 2 features*</b> | -0.12 | 0.06 | Remember forced recognition 1 feature* | 0.04  | 0.07 |
| <b>Total go hit</b>                            | -0.12 | 0.06 | Spatial capacity load 5 accuracy*      | 0.03  | 0.07 |
| Conflict effect                                | -0.13 | 0.09 | Vpatial capacity load 3 RT*            | 0.03  | 0.06 |
| Know words accuracy*                           | -0.13 | 0.07 | Spatial manipulation RT*               | 0.03  | 0.07 |
| <b>Verbal capacity load 9 RT*</b>              | -0.13 | 0.07 | Verbal capacity load 5 accuracy*       | 0.03  | 0.07 |
| <b>BART_total pumps*</b>                       | -0.13 | 0.06 | Conflict effect                        | 0.01  | 0.06 |
| <b>Spatial manipulation accuracy*</b>          | -0.16 | 0.06 | ColorTrail interference                | -0.01 | 0.08 |
| <b>Reward dependence</b>                       | -0.18 | 0.06 | Verbal manipulation RT*                | -0.02 | 0.07 |
| <b>Spatial capacity load 7 accuracy*</b>       | -0.18 | 0.06 | Verbal capacity load 5 RT*             | -0.02 | 0.07 |
| <b>Remember colors accuracy*</b>               | -0.23 | 0.07 | ANT_Interference RT*                   | -0.02 | 0.06 |
| <b>Verbal capacity load 3 accuracy*</b>        | -0.24 | 0.07 | Hallucinations*                        | -0.03 | 0.10 |
| <b>Verbal capacity load 7 accuracy*</b>        | -0.25 | 0.07 | Positive symptoms*                     | -0.03 | 0.08 |
| <b>Verbal capacity load 9 accuracy*</b>        | -0.26 | 0.06 | Taskswitch residSwitchCost             | -0.03 | 0.07 |
| <b>Scene recognition encoding accuracy*</b>    | -0.26 | 0.09 | Energy(Restless)                       | -0.03 | 0.06 |
| <b>Spatial maximum capacity*</b>               | -0.27 | 0.06 | Scene recognition recall RT*           | -0.04 | 0.07 |
| <b>Spatial capacity load 1 accuracy*</b>       | -0.28 | 0.07 | Scene recognition encoding RT*         | -0.04 | 0.07 |
| <b>Digit span forward</b>                      | -0.29 | 0.08 | Delay discounting small rewards*       | -0.04 | 0.06 |
| <b>Remember words accuracy*</b>                | -0.29 | 0.07 | Taskswitch switch cost                 | -0.05 | 0.06 |
| <b>Spatial maintenance accuracy*</b>           | -0.30 | 0.07 | Spatial maintenance RT*                | -0.05 | 0.07 |
| <b>Taskswitch total accuracy</b>               | -0.30 | 0.08 | Stop signal quantile RT*               | -0.06 | 0.07 |
| <b>Verbal maximum capacity*</b>                | -0.31 | 0.07 | Know mean RT*                          | -0.06 | 0.07 |
| <b>Letter fluency</b>                          | -0.31 | 0.07 | Spatial capacity load 3 RT*            | -0.08 | 0.07 |
| <b>Know forced recognition 2 features*</b>     | -0.32 | 0.07 | Delay discounting medium rewards*      | -0.08 | 0.07 |
| <b>Verbal capacity load 5 accuracy*</b>        | -0.32 | 0.07 | Positive formal thought*               | -0.08 | 0.11 |
| <b>Spatial capacity load 5 accuracy*</b>       | -0.34 | 0.06 |                                        |       |      |

|                                             |       |      |                                         |       |      |
|---------------------------------------------|-------|------|-----------------------------------------|-------|------|
| <b>Verbal manipulation accuracy*</b>        | -0.34 | 0.06 | Attention*                              | -0.08 | 0.11 |
| <b>Spatial capacity load 3 accuracy*</b>    | -0.35 | 0.07 | Avolition*                              | -0.10 | 0.10 |
| <b>Matrix reasoning</b>                     | -0.35 | 0.06 | Delay discounting total rewards*        | -0.11 | 0.06 |
| <b>Digit span sequencing</b>                | -0.37 | 0.06 | Spatial capacity load 1 RT*             | -0.11 | 0.07 |
| <b>Digit span backward</b>                  | -0.37 | 0.07 | Reward dependence                       | -0.12 | 0.06 |
| <b>Vocabulary</b>                           | -0.38 | 0.06 | Functional impulsivity                  | -0.12 | 0.06 |
| <b>Verbal maintenance accuracy*</b>         | -0.41 | 0.07 | Eysenck venturesomeness                 | -0.12 | 0.08 |
| <b>Visual reproduction recognition</b>      | -0.43 | 0.07 | Negative symptoms*                      | -0.13 | 0.09 |
| <b>Letter/Number sequencing</b>             | -0.44 | 0.05 | <b>Total false alarms</b>               | -0.13 | 0.07 |
| <b>Long delay recognition</b>               | -0.46 | 0.06 | <b>Verbal maintenance RT*</b>           | -0.13 | 0.07 |
| <b>Visual reproduction delayed recall</b>   | -0.47 | 0.06 | Infrequency(careless response)          | -0.14 | 0.08 |
| <b>Symbol span</b>                          | -0.49 | 0.05 | Total go hit                            | -0.14 | 0.08 |
| <b>Scene recognition recall accuracy*</b>   | -0.49 | 0.07 | <b>Spatial capacity load 5 RT*</b>      | -0.14 | 0.07 |
| <b>Visual reproduction immediate recall</b> | -0.51 | 0.06 | <b>Delay discounting large rewards*</b> | -0.15 | 0.06 |
| <b>MPQ control</b>                          | -0.57 | 0.05 | <b>Spatial capacity load 7 RT*</b>      | -0.17 | 0.07 |
| <b>Short delay cued recall</b>              | -0.61 | 0.05 | Alogia*                                 | -0.18 | 0.10 |
| <b>Short delay free recall</b>              | -0.61 | 0.05 | <b>Blunt affect*</b>                    | -0.21 | 0.10 |
| <b>Long delay free recall</b>               | -0.62 | 0.05 | <b>Persistence</b>                      | -0.37 | 0.06 |
| <b>Long delay cued recall</b>               | -0.62 | 0.05 | <b>MPQ control</b>                      | -0.44 | 0.05 |

1  
2

| <b>LV #3</b>               |          |           | <b>LV#4</b>                    |          |           |
|----------------------------|----------|-----------|--------------------------------|----------|-----------|
|                            | <b>r</b> | <b>SD</b> |                                | <b>r</b> | <b>SD</b> |
| <b>Harm avoidance</b>      | 0.68     | 0.04      | <b>Total false alarms</b>      | 0.28     | 0.07      |
| <b>Social anxiety</b>      | 0.56     | 0.04      | <b>Nonplanning</b>             | 0.20     | 0.07      |
| <b>Negative symptoms*</b>  | 0.49     | 0.09      | <b>ColorTrail interference</b> | 0.17     | 0.06      |
| <b>MPQ control</b>         | 0.45     | 0.06      | Spatial capacity load 3 RT*    | 0.13     | 0.07      |
| <b>Alogia*</b>             | 0.41     | 0.10      | ANT_Interference RT*           | 0.13     | 0.07      |
| <b>Physical anhedonia</b>  | 0.39     | 0.06      | Total go hit                   | 0.12     | 0.09      |
| <b>Blunt affect*</b>       | 0.39     | 0.11      | Scene recognition recall RT*   | 0.12     | 0.07      |
| <b>Social anhedonia</b>    | 0.39     | 0.06      | Taskswitch interference        | 0.11     | 0.07      |
| <b>Anhedonia*</b>          | 0.38     | 0.12      | Spatial maintenance RT*        | 0.11     | 0.07      |
| <b>Positive symptoms*</b>  | 0.33     | 0.08      | Spatial manipulation RT*       | 0.11     | 0.07      |
| <b>Somatization</b>        | 0.33     | 0.06      | Attention*                     | 0.11     | 0.11      |
| <b>Depression/anxiety*</b> | 0.31     | 0.09      | Spatial capacity load 5 RT*    | 0.10     | 0.07      |
| <b>Avolition*</b>          | 0.30     | 0.11      | Spatial capacity load 1 RT*    | 0.10     | 0.07      |
| <b>Attention*</b>          | 0.25     | 0.11      | Taskswitch residSwitchCost     | 0.10     | 0.06      |
| <b>Hallucinations*</b>     | 0.25     | 0.11      | Delay discounting medium       | 0.10     | 0.07      |

|                                       |      |      |                             |       |      |
|---------------------------------------|------|------|-----------------------------|-------|------|
|                                       |      |      | rewards*                    |       |      |
| <b>Anxiety</b>                        | 0.23 | 0.08 | Spatial capacity load 7 RT* | 0.08  | 0.07 |
| <b>Depression</b>                     | 0.23 | 0.08 | Know mean RT*               | 0.08  | 0.08 |
| <b>Schizoid personality</b>           |      |      | Delay discounting small     |       |      |
|                                       | 0.21 | 0.06 | rewards*                    | 0.07  | 0.07 |
| <b>HAMD_depression*</b>               | 0.21 | 0.09 | Verbal capacity load 5 RT*  | 0.07  | 0.08 |
| <b>Interpersonal sensitivity</b>      | 0.19 | 0.09 | Taskswitch switch cost      | 0.07  | 0.06 |
| <b>Mood lability</b>                  |      |      | Delay discounting total     |       |      |
|                                       | 0.18 | 0.07 | rewards*                    | 0.07  | 0.07 |
| <b>Perceptual aberrations</b>         |      |      | Scene recognition encoding  |       |      |
|                                       | 0.18 | 0.07 | RT*                         | 0.07  | 0.07 |
| <b>Obsessive compulsiveness</b>       | 0.17 | 0.08 | Verbal maintenance RT*      | 0.06  | 0.07 |
| Delusions*                            |      |      | Delay discounting large     |       |      |
|                                       | 0.16 | 0.11 | rewards*                    | 0.06  | 0.07 |
| Go hit median RT                      |      |      | Remember colors             |       |      |
|                                       | 0.14 | 0.07 | accuracy*                   | 0.06  | 0.07 |
| <b>Scene recognition encoding RT*</b> | 0.14 | 0.07 | Vpatial capacity load 3 RT* | 0.05  | 0.07 |
| Infrequency(careless response)        |      |      | Daydreaming                 |       |      |
|                                       | 0.11 | 0.08 |                             | 0.05  | 0.07 |
| Know mean RT*                         | 0.09 | 0.07 | Digit span forward          | 0.03  | 0.07 |
| Stop signal quantile RT*              | 0.08 | 0.07 | Avolition*                  | 0.03  | 0.12 |
| Scene recognition recall RT*          | 0.08 | 0.07 | Verbal manipulation RT*     | 0.03  | 0.07 |
| Remember mean RT*                     | 0.07 | 0.07 | Verbal capacity load 9 RT*  | 0.02  | 0.07 |
| Vpatial capacity load 3 RT*           | 0.07 | 0.07 | Verbal capacity load 7 RT*  | 0.02  | 0.07 |
| Spatial maintenance RT*               | 0.07 | 0.07 | Conflict effect             | 0.01  | 0.06 |
| Spatial manipulation RT*              | 0.07 | 0.07 | Eysenck venturesomeness     | 0.01  | 0.09 |
| Spatial capacity load 1 RT*           | 0.07 | 0.07 | Blunt affect*               | 0.00  | 0.11 |
| Verbal capacity load 9 RT*            |      |      | Know forced recognition 2   |       |      |
|                                       | 0.06 | 0.07 | features*                   | 0.00  | 0.08 |
| Spatial capacity load 3 RT*           | 0.05 | 0.07 | Alogia*                     | 0.00  | 0.11 |
| Verbal capacity load 5 RT*            | 0.05 | 0.07 | Stop signal quantile RT*    | 0.00  | 0.07 |
| BART_total pumps*                     | 0.04 | 0.07 | Conflict effect RT          | 0.00  | 0.07 |
| Delay discounting large               |      |      | MPQ control                 |       |      |
| rewards*                              | 0.04 | 0.06 |                             | -0.01 | 0.07 |
| Spatial capacity load 5 RT*           | 0.04 | 0.06 | Attention impulsivity       | -0.01 | 0.07 |
| Daydreaming                           | 0.04 | 0.06 | BART_total pumps*           | -0.01 | 0.07 |
| Spatial capacity load 7 RT*           | 0.03 | 0.07 | Know colors accuracy*       | -0.01 | 0.08 |
| Eysenck empathy                       |      |      | Verbal capacity load 9      |       |      |
|                                       | 0.03 | 0.06 | accuracy*                   | -0.02 | 0.07 |
| Taskswitch residSwitchCost            |      |      | Verbal maintenance          |       |      |
|                                       | 0.03 | 0.07 | accuracy*                   | -0.02 | 0.07 |
| Verbal maintenance RT*                |      |      | Remember forced             |       |      |
|                                       | 0.02 | 0.07 | recognition 2 features*     | -0.02 | 0.08 |
| Remember forced                       |      |      | Know forced recognition 1   |       |      |
| recognition 1 feature*                | 0.02 | 0.08 | feature*                    | -0.03 | 0.08 |
| Verbal capacity load 7 RT*            | 0.02 | 0.07 | Vocabulary                  | -0.03 | 0.06 |
| ANT_Interference RT*                  | 0.02 | 0.07 | Motor impulsivity           | -0.03 | 0.08 |
| Delay discounting total               | 0.02 | 0.07 | Verbal capacity load 5      | -0.03 | 0.07 |

|                                      |       |      |                                        |       |      |
|--------------------------------------|-------|------|----------------------------------------|-------|------|
| rewards*                             |       |      | accuracy*                              |       |      |
| Know forced recognition 1 feature*   | 0.02  | 0.07 | Hyperactivity severity*                | -0.03 | 0.10 |
| Delay discounting medium rewards*    | 0.01  | 0.06 | Digit span backward                    | -0.04 | 0.07 |
| Long delay cued recall               | 0.00  | 0.07 | Attention severity*                    | -0.04 | 0.10 |
| Remember words accuracy*             | 0.00  | 0.07 | Harm avoidance                         | -0.04 | 0.07 |
| Long delay free recall               | 0.00  | 0.07 | Remember forced recognition 1 feature* | -0.04 | 0.08 |
| Short delay cued recall              | 0.00  | 0.07 | Letter fluency                         | -0.05 | 0.07 |
| Bizarre behavior*                    | -0.01 | 0.11 | Hallucinations*                        | -0.05 | 0.10 |
| Long delay recognition               | -0.02 | 0.06 | Spatial manipulation accuracy*         | -0.05 | 0.07 |
| Total go hit                         | -0.03 | 0.07 | Know words accuracy*                   | -0.06 | 0.08 |
| Know forced recognition 2 features*  | -0.03 | 0.07 | ADHD symptoms                          | -0.06 | 0.07 |
| Taskswitch interference              | -0.03 | 0.08 | Remember words accuracy*               | -0.07 | 0.08 |
| Delay discounting small rewards*     | -0.03 | 0.07 | Novelty seeking                        | -0.07 | 0.08 |
| Short delay free recall              | -0.04 | 0.08 | Verbal maximum capacity*               | -0.08 | 0.07 |
| Remember colors accuracy*            | -0.05 | 0.07 | Spatial capacity load 1 accuracy*      | -0.09 | 0.07 |
| Visual reproduction delayed recall   | -0.07 | 0.07 | Dysfunctional impulsivity              | -0.09 | 0.06 |
| Nonplanning                          | -0.07 | 0.07 | Social anhedonia                       | -0.10 | 0.07 |
| Verbal manipulation RT*              | -0.07 | 0.07 | Positive formal thought*               | -0.10 | 0.11 |
| ADHD symptoms                        | -0.07 | 0.07 | Verbal manipulation accuracy*          | -0.11 | 0.07 |
| Attention impulsivity                | -0.08 | 0.07 | Spatial capacity load 5 accuracy*      | -0.11 | 0.07 |
| Taskswitch switch cost               | -0.09 | 0.08 | Scene recognition recall accuracy*     | -0.12 | 0.07 |
| YMRC_mania*                          | -0.10 | 0.10 | Reward dependence                      | -0.12 | 0.08 |
| Spatial maintenance accuracy*        | -0.10 | 0.07 | Infrequency(careless response)         | -0.13 | 0.07 |
| Know words accuracy*                 | -0.10 | 0.08 | Letter/Number sequencing               | -0.13 | 0.07 |
| Scene recognition encoding accuracy* | -0.11 | 0.07 | Delusions*                             | -0.13 | 0.10 |
| Conflict effect RT                   | -0.11 | 0.06 | Spatial maintenance accuracy*          | -0.13 | 0.07 |
| Spatial capacity load 1 accuracy*    | -0.11 | 0.07 | Remember mean RT*                      | -0.14 | 0.07 |
| Visual reproduction immediate recall | -0.12 | 0.07 | Verbal capacity load 7 accuracy*       | -0.14 | 0.07 |
| Vocabulary                           | -0.12 | 0.06 | Physical anhedonia                     | -0.15 | 0.08 |
| Taskswitch total accuracy            | -0.12 | 0.07 | Scene recognition encoding accuracy*   | -0.15 | 0.07 |
| Total false alarms                   | -0.12 | 0.07 | Negative symptoms*                     | -0.15 | 0.10 |
| Know colors accuracy*                | -0.13 | 0.07 | <b>Eysenck impulsiveness</b>           | -0.17 | 0.07 |

|                                                |       |      |                                             |       |      |
|------------------------------------------------|-------|------|---------------------------------------------|-------|------|
| Verbal maximum capacity*                       | -0.13 | 0.07 | Mania/disorganization*                      | -0.17 | 0.10 |
| <b>Scene recognition recall accuracy*</b>      | -0.14 | 0.07 | <b>Perceptual aberrations</b>               | -0.18 | 0.06 |
| <b>Verbal capacity load 5 accuracy*</b>        | -0.14 | 0.07 | <b>Social anxiety</b>                       | -0.18 | 0.07 |
| <b>ColorTrail interference</b>                 | -0.16 | 0.07 | <b>Spatial maximum capacity*</b>            | -0.19 | 0.07 |
| <b>Remember forced recognition 2 features*</b> | -0.16 | 0.07 | <b>Verbal capacity load 3 accuracy*</b>     | -0.19 | 0.07 |
| <b>Conflict effect</b>                         | -0.16 | 0.07 | <b>Spatial capacity load 7 accuracy*</b>    | -0.20 | 0.07 |
| <b>Spatial capacity load 3 accuracy*</b>       | -0.16 | 0.07 | <b>Spatial capacity load 3 accuracy*</b>    | -0.20 | 0.07 |
| <b>Spatial capacity load 7 accuracy*</b>       | -0.16 | 0.07 | <b>Symbol span</b>                          | -0.21 | 0.06 |
| <b>Verbal capacity load 7 accuracy*</b>        | -0.17 | 0.07 | <b>Mood lability</b>                        | -0.22 | 0.07 |
| <b>Spatial maximum capacity*</b>               | -0.17 | 0.07 | <b>Positive symptoms*</b>                   | -0.23 | 0.09 |
| <b>Verbal capacity load 9 accuracy*</b>        | -0.17 | 0.07 | Anhedonia*                                  | -0.24 | 0.12 |
| <b>Spatial capacity load 5 accuracy*</b>       | -0.18 | 0.07 | <b>Schizoid personality</b>                 | -0.24 | 0.08 |
| <b>Eysenck impulsiveness</b>                   | -0.18 | 0.06 | <b>Eysenck empathy</b>                      | -0.24 | 0.07 |
| <b>Verbal maintenance accuracy*</b>            | -0.18 | 0.06 | <b>Taskswitch total accuracy</b>            | -0.25 | 0.07 |
| <b>Verbal capacity load 3 accuracy*</b>        | -0.19 | 0.07 | <b>Functional impulsivity</b>               | -0.25 | 0.07 |
| Positive formal thought*                       | -0.19 | 0.12 | <b>YMRC_mania*</b>                          | -0.27 | 0.11 |
| <b>Symbol span</b>                             | -0.21 | 0.07 | <b>Obsessive compulsiveness</b>             | -0.27 | 0.06 |
| <b>Spatial manipulation accuracy*</b>          | -0.22 | 0.07 | <b>Digit span sequencing</b>                | -0.27 | 0.08 |
| <b>Digit span backward</b>                     | -0.23 | 0.07 | <b>Go hit median RT</b>                     | -0.28 | 0.07 |
| <b>Dysfunctional impulsivity</b>               | -0.23 | 0.07 | <b>Visual reproduction recognition</b>      | -0.29 | 0.07 |
| <b>Verbal manipulation accuracy*</b>           | -0.23 | 0.07 | <b>Depression/anxiety*</b>                  | -0.30 | 0.10 |
| <b>Reward dependence</b>                       | -0.24 | 0.06 | <b>Matrix reasoning</b>                     | -0.31 | 0.06 |
| <b>Visual reproduction recognition</b>         | -0.26 | 0.06 | <b>Anxiety</b>                              | -0.32 | 0.07 |
| <b>Letter/Number sequencing</b>                | -0.26 | 0.06 | <b>HAMD_depression*</b>                     | -0.33 | 0.10 |
| <b>Letter fluency</b>                          | -0.27 | 0.07 | <b>Bizarre behavior*</b>                    | -0.33 | 0.12 |
| <b>Digit span forward</b>                      | -0.27 | 0.06 | <b>Hypomanic peronality</b>                 | -0.34 | 0.06 |
| <b>Matrix reasoning</b>                        | -0.29 | 0.06 | <b>Long delay recognition</b>               | -0.34 | 0.06 |
| <b>Mania/disorganization*</b>                  | -0.29 | 0.09 | <b>Visual reproduction immediate recall</b> | -0.35 | 0.05 |
| <b>Digit span sequencing</b>                   | -0.29 | 0.06 | <b>Interpersonal sensitivity</b>            | -0.36 | 0.06 |
| <b>Attention severity*</b>                     | -0.30 | 0.09 | <b>Depression</b>                           | -0.37 | 0.06 |
| <b>Eysenck venturesomeness</b>                 | -0.35 | 0.06 | <b>Persistence</b>                          | -0.37 | 0.07 |
| <b>Hyperactivity severity*</b>                 | -0.43 | 0.09 | <b>Somatization</b>                         | -0.39 | 0.06 |
| <b>Motor impulsivity</b>                       | -0.45 | 0.06 | <b>Energy(Restless)</b>                     | -0.40 | 0.05 |

|                               |       |      |                                               |       |      |
|-------------------------------|-------|------|-----------------------------------------------|-------|------|
| <b>Energy(Restless)</b>       | -0.49 | 0.05 | <b>Visual reproduction<br/>delayed recall</b> | -0.42 | 0.06 |
| <b>Hypomanic peronality</b>   | -0.50 | 0.05 | <b>Short delay free recall</b>                | -0.44 | 0.05 |
| <b>Persistence</b>            | -0.50 | 0.05 | <b>Long delay cued recall</b>                 | -0.48 | 0.05 |
| <b>Novelty seeking</b>        | -0.62 | 0.05 | <b>Short delay cued recall</b>                | -0.49 | 0.05 |
| <b>Functional impulsivity</b> | -0.71 | 0.03 | <b>Long delay free recall</b>                 | -0.49 | 0.05 |

1

2

3

4

5

6

7

Notes: The contribution of each behavioral measure to LV 1-4 (correlation values) was shown as decreasing order, along with their bootstrap-estimated standard deviations (SD). This table lists both behavior measures that included in the PLS analysis and behavior measures that were considered in post hoc analyses due to missing data (\*). Correlations with significant bootstrapped Z scores that survived FDR correction ( $q < 0.05$ ) are shown in bold.

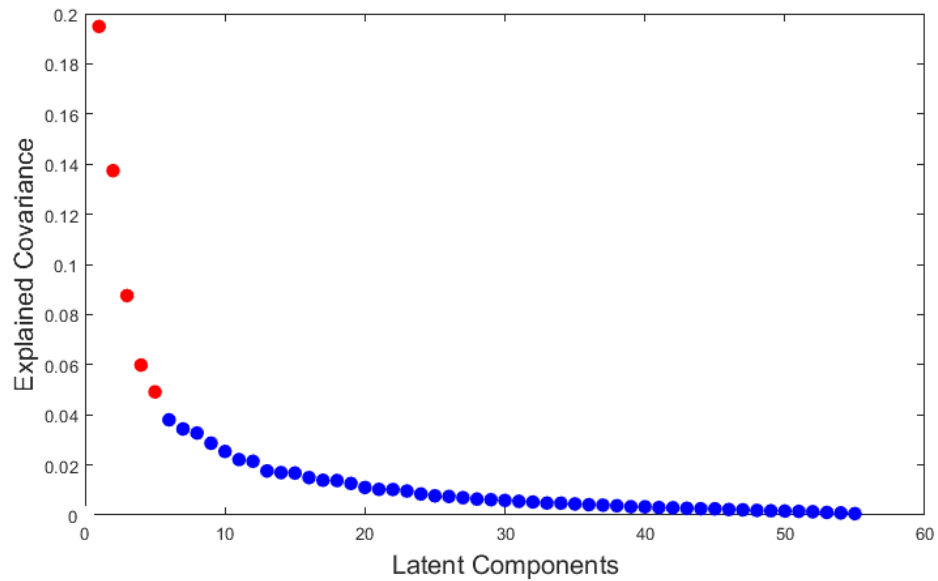

1  
2  
3  
4

Figure S1. The amount of covariance explained by each LV. Five LVs survived after applying FDR correction ( $q < 0.05$ ) to the p-values derived from permutation tests.



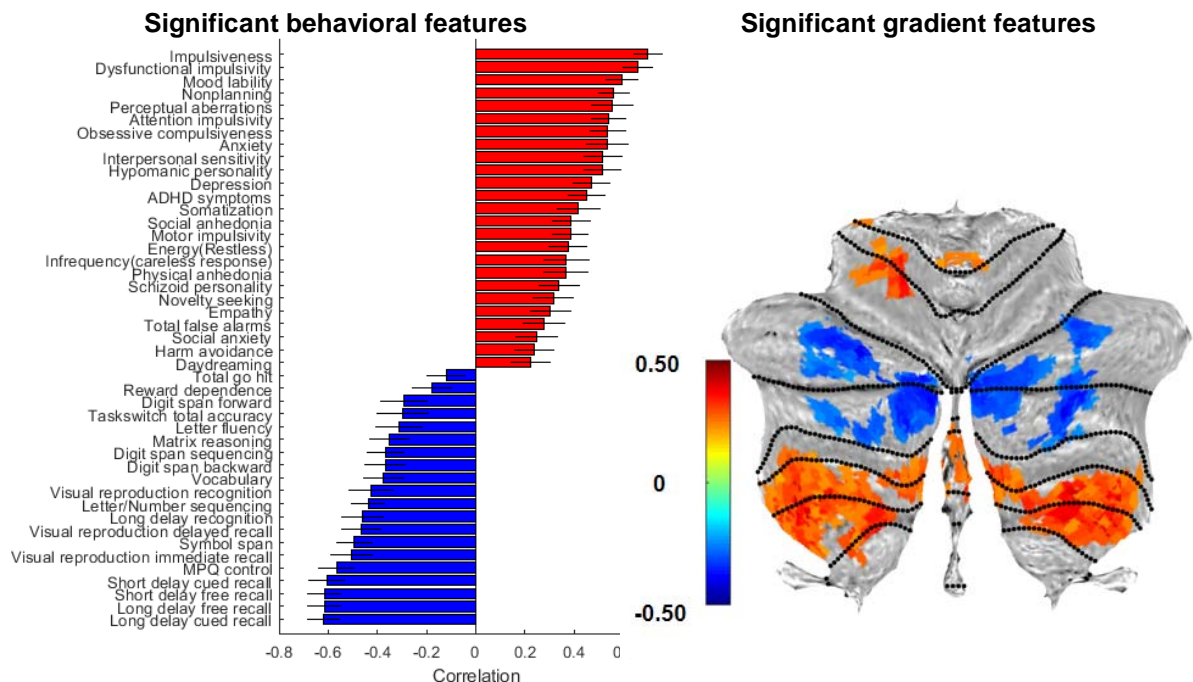

1  
2 Figure S2. Significant behavioral and cerebral connectivity gradient features associated with  
3 LV1.  
4

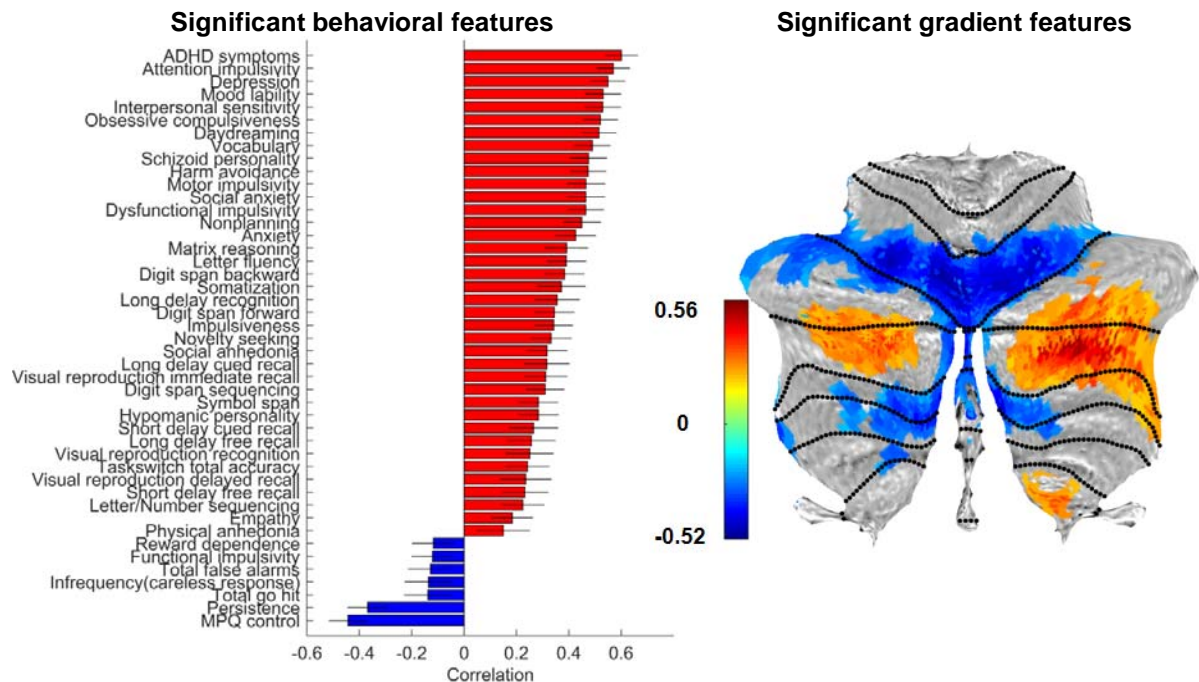

1  
2 Figure S3. Significant behavioral and cerebral connectivity gradient features associated with  
3 LV2.  
4

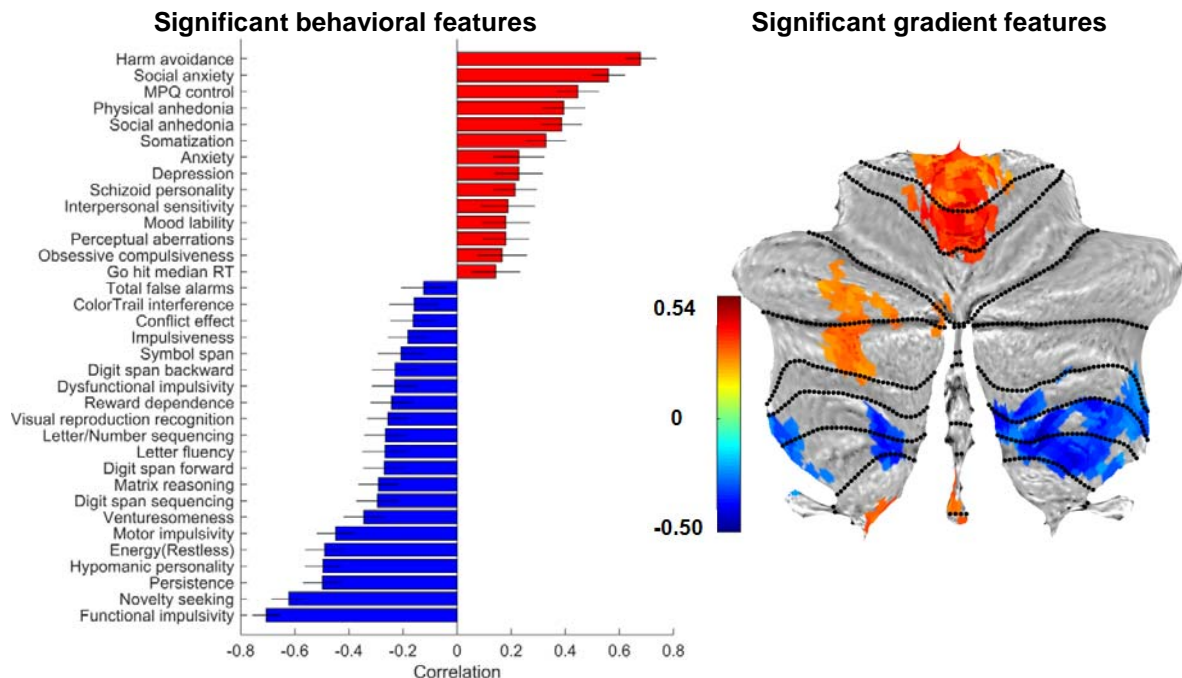

1  
2 Figure S4. Significant behavioral and cerebral connectivity gradient features associated with  
3 LV3.  
4

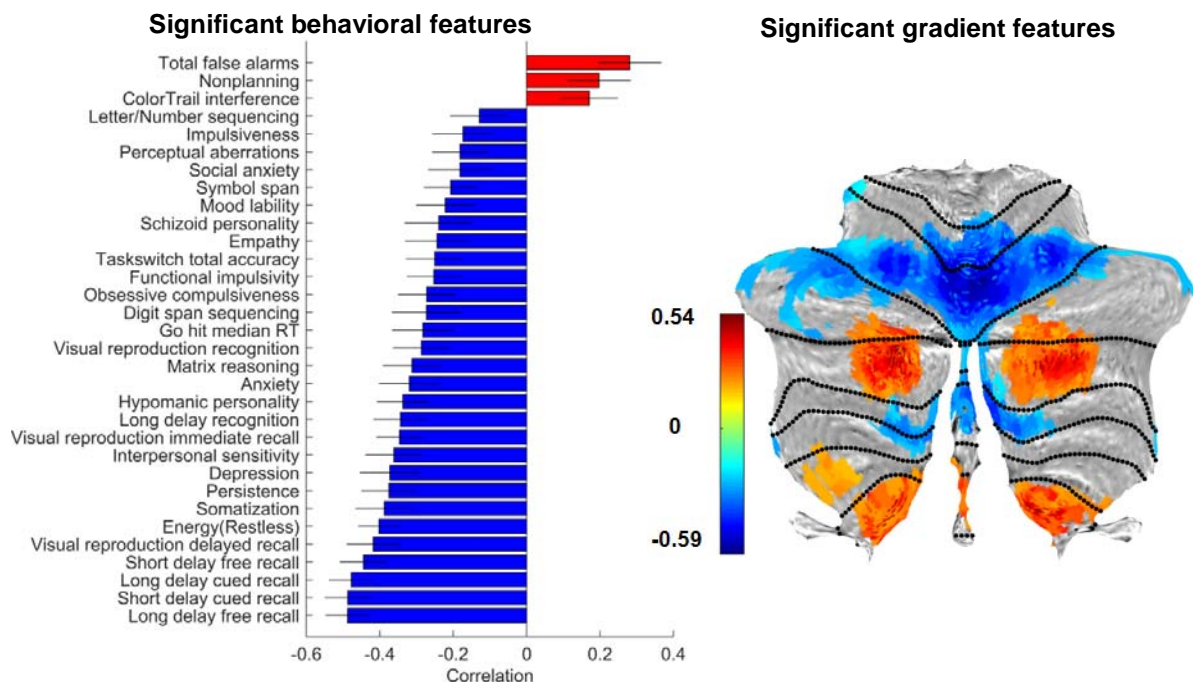

1  
2 Figure S5. Significant behavioral and cerebral connectivity gradient features associated with  
3 LV4.
